# Supplementary material
Source: publisher site journal article supplement (https://www.dovepress.com/article/395256)
Supplement: Supplementary file 1 [file get_supplementary_file.php]

# Supplementary Materials

**Supplementary Table 1** Summary of basic information of plant adaptogens

| **Number** | **Adaptive plants** | **Family** |
| --- | --- | --- |
| 1 | *Aegle marmelos* (L.) Corrêa | Rutaceae Juss. |
| 2 | *Ajuga turkestanica* (Regel) Briq. | Lamiaceae Martinov |
| 3 | *Albizia julibrissin* Durazz. | Fabaceae Lindl. |
| 4 | *Alstonia scholaris* (L.) R. Br. | Apocynaceae Juss. |
| 5 | *Allium sativum* L. | Amaryllidaceae J. St.-Hil. |
| 6 | *Andrographis paniculata* (Burm.f.) Nees | Acanthaceae Juss. |
| 7 | *Annona muricata* L. | Annonaceae Juss. |
| 8 | *Aralia elata* (Miq) Seem. | Araliaceae Juss. |
| 9 | *Aralia elata var. mandshurica* (Rupr. &  Maxim.) J.Wen (syn. *Aralia mandshurica*  Rupr. & Maxim) | Araliaceae Juss. |
| 10 | *Aralia cordata var.sachalinensis* (Regel)Nakai(syn.*Aralia schmidtii*Pojark.) | Araliaceae Juss. |
| 11 | *Argyreia nervosa* (Burm. f.) Bojer (syn.*Argyreia speciosa* (L. f.) Sweet) | Convolvulaceae Juss. |
| 12 | *Asparagus racemosus* Willd. | Asparagaceae Juss. |
| 13 | *Azadirachta indica* A. Juss. | Meliaceae Juss. |
| 14 | *Bacopa monnieri* (L.) Wettst. | Plantaginaceae Juss. |
| 15 | *Bergenia crassifolia* (L.) Fritsch | Saxifragaceae Juss. |
| 16 | *Boerhaavia diffusa* Brandegee | Nyctaginaceae Juss. |
| 17 | *Bryonia alba* L. | Cucurbitaceae Juss. |
| 18 | *Butea monosperma* (Lam.) Taub. | Fabaceae Lindl. |
| 19 | *Caesalpinia bonduc* (L.) Roxb. | Fabaceae Lindl. |
| 20 | *Cannabis sativa* L. | Cannabaceae Martinov |
| 21 | *Carum carvi* L. | Apiaceae Lindl. |
| 22 | *Centella asiatica* (L.) Urb. | Apiaceae Lindl. |
| 23 | *Chlorophytum borivilianum* Santapau &R.R.Fern. | Asparagaceae Juss. |
| 24 | *Chrysactinia mexicana* A. Gray | Asteraceae Bercht. & J. Presl |
| 25 | *Cicer arietinum* L. | Fabaceae Lindl. |
| 26 | *Clematis alpina* subsp. sibirica (L.) Kuntze(syn. *Atragene sibirica* L.) | Ranunculaceae Juss. |
| 27 | *Cnestis ferruginea* Vahl ex DC. | Connaraceae R. Br. |
| 28 | *Codonopsis pilosula* (Franch.) Nannf. | Campanulaceae Juss. |
| 29 | *Convolvulus pluricaulis* Chois | Convolvulaceae Juss. |
| 30 | *Curculigo orchioides* Gaertn. | Hypoxidaceae R. Br. |
| 31 | Curcumin from Turmeric (*Curcuma longa*) | Zingiberaceae Martinov |
| 32 | *Dioscorea deltoidea* Wall. ex Griseb. | Dioscoreaceae R. Br. |
| 33 | *Diospyros malabarica* (Desr.) Kostel. (Syn.*Diospyros peregrina* (Gaertn.) Gürke) | Ebenaceae Gürke |
| 34 | *Elaeagnus rhamnoides* (L.) A.Nelson.  (Syn.*Hippophae rhamnoides* L.) | Elaeagnaceae Juss. |
| 35 | *Eleutherococcus senticosus* (Rupr. & Maxim.) Maxim. | Araliaceae Juss. |
| 36 | *Eleutherococcus sessiliflorus* (Rupr. & Maxim.) S.Y. Hu (syn *Acanthopanax sessiliflorus*  (Rupr. & Maxim.) Seem.) | Araliaceae Juss. |
| 37 | *Emblica officinalis* Gaetrn. | Euphorbiaceae Juss. |
| 38 | *Eucommia ulmoides* Oliv. | Eucommiaceae Engl. |
| 39 | *Evolvulus alsinoides* (L.) L. | Convolvulaceae Juss. |
| 40 | *Fagopyrum esculentum* Moench | Polygonaceae Juss. |
| 41 | *Firmiana simplex* (L.) W. Wight (Syn *Sterculia platanifolia* L.) | Malvaceae Juss. |
| 42 | *Gentiana pedicellata* (D.Don) Wall | Gentianaceae Juss. |
| 43 | *Ginkgo biloba* L. | Ginkgoaceae Engl. |
| 44 | *Glycyrrhiza glabra* L. | Fabaceae Lindl. |
| 45 | *Hebanthe eriantha* (Poir.) Pedersen  (Syn.*Pfaffia paniculata* (Mart.) Kuntze) | Amaranthaceae Juss. |
| 46 | *Heteropterys aphrodisiaca* Machado | Malpighiaceae Juss. |
| 47 | *Heteropterys tomentosa* A.Juss. | Malpighiaceae Juss. |
| 48 | *Hibiscus cannabinus* L. | Malvaceae Juss. |
| 49 | *Holoptelea integrifolia* Planch. | Ulmaceae Mirb. |
| 50 | *Hoppea dichotoma* Willd. | Gentianaceae Juss. |
| 51 | *Hypericum perforatum* L. | Hypericaceae Juss. |
| 52 | *Justicia diffusa* Willd. (Syn *Rostellularia*  *diffusa* (Willd.) Nees.) | Acanthaceae Juss. |
| 53 | *Lagenaria siceraria* (Molina) Standl. | Cucurbitaceae Juss. |
| 54 | *Lepidium meyenii* Walp. (Syn. *Lepidium*  *peruvianum* G.Chacón) | Brassicaceae Burnett |
| 55 | *Marantodes pumilum* (Blume) Kuntze.  (Syn.*Labisia pumila* (Blume) Mez) | Primulaceae Batsch ex Borkh. |
| 56 | *Melilotus officinalis* (L.) Pall. | Fabaceae Lindl. |
| 57 | *Mitragyna inermis* (Willd.) Kuntze (Syn  *Mitragyna africana* (Willd.) Korth.) | Rubiaceae Juss. |
| 58 | *Momordica charantia* L. | Cucurbitaceae Juss. |
| 59 | *Morus alba* L. | Moraceae Gaudich. |
| 60 | *Mucuna pruriens* (L.) DC. | Fabaceae Lindl. |
| 61 | *Murraya koenigii* (L.) Spreng. | Rutaceae Juss. |
| 62 | *Mussaenda frondosa* L. | Rubiaceae Juss. |
| 63 | *Nelumbo nucifera* Gaertn. | Nelumbonaceae A. Rich. |
| 64 | *Nigella sativa* L. | Ranunculaceae Juss. |
| 65 | *Ocimum tenuiflorum* L. (Syn.*Ocimum*  *sanctum* L.) | Lamiaceae Martinov |
| 66 | *Oplopanax elatus* (Nakai) Nakai (Syn.  *Echinopanax elatum* Nakai) | Araliaceae Juss. |
| 67 | *Panax ginseng* C.A.Mey. | Araliaceae Juss. |
| 68 | *Panax notoginseng* (Burk.) FH Chen | Araliaceae Juss. |
| 69 | *Panax pseudoginseng* Wall. | Araliaceae Juss. |
| 70 | *Pandanus odorifer* (Forssk.) Kuntze  (Syn.*Pandanus odoratissimus* L.f.) | Pandanaceae R. Br. |
| 71 | *Paullinia cupana* Kunth | Sapindaceae Juss. |
| 72 | *Putranjiva roxburghii* Wall. (Syn. *Drypetes roxburghii* (Wall.) Hurus.) | Putranjivaceae Meisn. |
| 73 | *Piper longum* L. | Piperaceae Giseke |
| 74 | *Polyalthia cerasoides* (Roxb.) Bedd. | Annonaceae Juss. |
| 75 | *Polyscias filicifolia* (C.Moore ex E.Fourn.)L.H.Bailey | Araliaceae Juss. |
| 76 | *Potentilla alba* L. | Rosaceae Juss. |
| 77 | *Prunella vulgaris* L. | Lamiaceae Martinov |
| 78 | *Psidium guajava* L. | Myrtaceae Juss. |
| 79 | *Ptychopetalum olacoides* Benth. | Olacaceae R. Br. |
| 80 | *Pueraria tuberosa* (Roxb. ex Willd.) DC. | Fabaceae Lindl. |
| 81 | *Rhaponticum carthamoides* (Willd.)Iljin (Syn.  *Leuzea carthamoides* (Willd.) DC.) | Asteraceae Bercht. & J. Presl |
| 82 | *Rhodiola crenulata* (Hook.f. & Thomson) H.Ohba | Crassulaceae J. St.-Hil. |
| 83 | *Rhodiola heterodonta* (Hook. f. & Thomson) Boriss. | Crassulaceae J. St.-Hil. |
| 84 | *Rhodiola imbricata* Edgew. | Crassulaceae J. St.-Hil. |
| 85 | *Rhodiola rosea* L. [today classed as *Sedum roseum* (L.) Scop.] | Crassulaceae J. St.-Hil. |
| 86 | *Rubia cordifolia* L. | Rubiaceae Juss. |
| 87 | *Salvia miltiorrhiza* Bunge | Lamiaceae Martinov |
| 88 | *Schisandra chinensis* (Turcz.) Baill. | Magnoliaceae Juss. |
| 89 | *Scutellaria baicalensis* Georgi | Lamiaceae Martinov |
| 90 | *Serratula tinctoria* L. (Syn.*Serratula*  *inermis* Poir.) | Asteraceae Bercht. & J. Presl |
| 91 | *Sida cordifolia* L. | Malvaceae Juss. |
| 92 | *Silene italica* (L.) Pers. | Caryophyllaceae Juss. |
| 93 | *Sinomenium acutum* (Thunb.) Rehder & E.H.Wilson | Menispermaceae Juss. |
| 94 | *Solanum torvum* SW. | Solanaceae Juss. |
| 95 | *Serratula coronate* L. | Asteraceae Bercht. & J. Presl |
| 96 | *Sutherlandia frutescens* (L.) R.Br. | Fabaceae Lindl. |
| 97 | *Syzygium aromaticum* (L.) Merr. & L.M.Perry.  (Syn. *Eugenia caryophyllus* (Spreng.)  Bullock & S.G.Harrison) | Myrtaceae Juss. |
| 98 | *Terminalia chebula* Retz. | Combretaceae R. Br. |
| 99 | *Tinospora sinensis* (Lour.) Merr.  (Syn.*Tinospora cordifolia* (Willd.) Miers,  Syn *Tinospora malabarica* (Lam.) Hook. f.& Thomson) | Menispermaceae Juss. |
| 100 | *Tribulus terrestris* L. | Zygophyllaceae R. Br. |
| 101 | *Trichilia catigua* A.Juss. | Meliaceae Juss. |
| 102 | *Trichopodium zeylanicum* (Gaertn.) Thwaites  (Syn.*Trichopus zeylanicus* Gaertn.) | Dioscoreaceae R. Br. |
| 103 | *Trigonella foenum‐graecum* L. | Fabaceae Lindl. |
| 104 | *Tylophora indica* (Burm. f.) Merr. | Apocynaceae Juss. |
| 105 | *Turnera diffusa* Willd. ex Schult. | Passifloraceae Juss. ex Roussel |
| 106 | *Uncaria tomentosa* (Willd. ex Schult.) DC. | Rubiaceae Juss. |
| 107 | *Vitis vinifera* L. | Vitaceae Juss. |
| 108 | *Withania somnifera* (L.) Dunal | Solanaceae Juss. |
| 109 | *Zingiber officinale* Roscoe | Zingiberaceae Martinov |

**Supplementary Table 2** Summary of the mechanisms of action of the plant adaptogens associated with the treatment of skin diseases

| **Disease** | **Plant** | **Compound** | **Treatment** | **Ref** |
| --- | --- | --- | --- | --- |
| **Atopic dermatitis** | *Cannabis sativa* L. | Cannabinoids | I. Stimulation of CB1R and CB2R receptors and inhibition of CGRP expression.  II. Attenuate Th2 inflammatory response. | [1](#_ENREF_1) |
|  | *Centella asiatica* (L.) Urb. | Phospholipid complexes | I. Inhibited NO production and expression of iNOS and COX-2.  II. Inhibited NFκB activity.  III. Inhibited the release of TNF-α, IL-1β, IL-6 and IgE. | [2](#_ENREF_2),[3](#_ENREF_3) |
|  | Curcumin from Turmeric (*Curcuma longa*) | Curcumin | I. Inhibited the expression of Th2 cytokines (IL-4/IL-5/IL-13/IL-31).  II. Reduced STAT-6 phosphorylation and GATA-3 expression. | [4](#_ENREF_4) |
|  | *Elaeagnus rhamnoides* (L.) A.Nelson.  (Syn.*Hippophae rhamnoides* L.) | Total flavonoids | I. Reduced inflammatory cytokine expression.  II. Regulated Th1/Th2 balance.  III. Exerted anti-inflammatory and skin barrier repair effects. | [5](#_ENREF_5) |
|  | *Ginkgo biloba* L. | Ginkgetin | I. Inhibited the expression of phospholipase A, COX-2 and inducible nitric oxide synthase and the pro-inflammatory factor IL-1β. | [6](#_ENREF_6) |
|  | *Glycyrrhiza glabra* L. | Licoricidin | I. Decreased in mRNA expression levels of pro-inflammatory cytokines.  II. Inhibited T cell activation by regulating PTPN1 activity. | [7](#_ENREF_7) |
|  | *Hypericum perforatum* L. | Hypericin | I. Increased hydration of the affected skin.  II. Reduced transdermal water loss and scaling level. | [8](#_ENREF_8) |
|  | *Morus alba* L. | Kuwanon G | I. Inhibited the inflammatory chemokine secretion through downregulation of STAT1 and NFκB p65 phosphorylation caused by TNF-α and IFN-γ stimulation. | [9](#_ENREF_9) |
|  | *Nelumbo nucifera* Gaertn. | Neferine | I. Inhibited the expression of chemokines produced by TNF-α and IFN-γ stimulation.  II. Significantly reduced transcutaneous water loss TWEL, erythema. | [10](#_ENREF_10) |
|  | *Nigella sativa* L. | Thymoquinone | I. Significantly reduce inflammatory cell infiltration and lower IgE levels.  II. Reduces IL-4, IL-5 and IFN-γ gene expression levels. | [11](#_ENREF_11) |
|  | *Panax ginseng* C.A.Mey. | Ginsenoside Rg5 | I. Down-regulation of NFκB / p38 MAPK / STAT1 signaling.  II. Decrease the level of TNF-α / IFN-γ induced chemokine production.  III. Decrease NO and ROS levels in cells. | [12](#_ENREF_12) |
|  | *Psidium guajava* L. | Ethyl acetate extracts | I. Inhibition of Th2 chemokine expression by suppressing IFN-γ/tumor necrosis factor-α co-induced activation of NFκB and STAT1. | [13](#_ENREF_13) |
|  | *Rhodiola crenulata* (Hook.f. & Thomson) H.Ohba | Root extracts | I. Up-regulated filaggrin (FLG), loricrin (LOR), and involucrin (IVL) expression levels.  II. Repair of skin barrier at lesions. | [14](#_ENREF_14) |
|  | *Salvia miltiorrhiza* Bunge | Salvianolic acid A | I. Reduced the level of IgE.  II. Decreased the level of cytokines such as IL-4, IL-13, IFN-γ. | [15](#_ENREF_15) |
|  | *Salvia miltiorrhiza* Bunge | Cryptotanshinone | I. Reduced the secretion of TNF-α and IL-1β pro-inflammatory cytokines.  II. Reduced immune cell infiltration.  III. Inhibited mast cell degranulation. | [16](#_ENREF_16) |
|  | *Schisandra chinensis* (Turcz.) Baill. | Anthocyanin 3-Rutinoside | I. Inhibited the secretion of inflammatory cytokines such as IL-6 and TNF-α.  II. Inhibited the NFκB phosphorylation. | [17](#_ENREF_17) |
|  | *Scutellaria baicalensis* Georgi | Skullcapflavone II | I. Inhibited the TNF-α/IFN-γ-induced expression of TARC, MDC, and CTSS by regulating STAT1, NFκB, and p38MAPK signaling pathways. | [18](#_ENREF_18) |
|  | *Scutellaria baicalensis* Georgi | Baicalin  [Baicalein](https://www.chemsrc.com/en/cas/491-67-8_314494.html) | I. Inducted the Sema3A expression.  II. Improved histamine resistance.  III. Regulated skin HPA axis function and reduced immune inflammatory response. | [19](#_ENREF_19),[20](#_ENREF_20) |
|  | *Sinomenium acutum* (Thunb.) Rehder &  E.H.Wilson | Sinomenine | I. Inhibited the p38MAPK-NF-κB pathway exerts anti-inflammatory effects.  II. Inhibited the TNF-α, IL-1β, IL-6 and other pro-inflammatory cytokines and NO production.  III. Reduced the expression level of iNOS and COX2. | [21](#_ENREF_21) |
|  | *Terminalia chebula* Retz. | Water extracts | I. Reduced MMP9 and IL-31 levels.  II. Regulated the expression balance among Th cell subpopulations. | [22](#_ENREF_22) |
|  | *Tribulus terrestris* L. | Extracts | I. Reduced TWEL values.  II. Reduced inflammatory cell infiltration.  III. Inhibited Orai-1 expression activity. | [23](#_ENREF_23) |
|  | *Uncaria tomentosa* (Willd. ex Schult.) DC. | Extracts | I. Can relieve symptoms of skin inflammation, itching and pain. | [24](#_ENREF_24) |
|  | *Vitis vinifera* L. | Resveratrol | I. Down-regulation of HMGB1 protein expression.  II. Decrease inflammatory factor levels and mast cell infiltration.  III. Improve the symptoms of atopic dermatitis. | [25](#_ENREF_25) |
| **Acne** | *Andrographis paniculata* (Burm.f.) Nees | Andrographolide | I. Dose-dependent inhibition of Propionibacterium acnes-induced production of IL-8 and TNF-α levels. | [26](#_ENREF_26) |
|  | *Asparagus racemosus* Willd. | Polyphenolic compounds | I. Can scavenge DPPH activity.  II. Can downregulate SRD5A1 and SRD5A2 mRNA expression.  III. Can predominant facial sebum reduction and pore-minimizing. | [27](#_ENREF_27) |
|  | *Azadirachta indica* A. Juss. | Water extracts | I. Show anti-inflammatory activity by suppressing the capacity of P. acnes-induced ROS and pro-inflammatory cytokines. | [28](#_ENREF_28) |
|  | *Cannabis sativa* L. | Cannabis sativa seed n-hexane extracts | I. Can reduce P. acnes-induced iNOS, COX-2, IL-1β, IL-8 expression levels.  II. Can inhibit NFκB and MAPKs signaling pathways. III. Can inhibit P. acnes-induced ERK and JNK and AP-1 trans activation.  IV. Can regulate IGF-1-induced AMPK and AKT/Fox01 signaling to regulate inflammation and lipid biosynthesis. | [29](#_ENREF_29) |
|  | *Centella asiatica* (L.) Urb. | Madecassoside | I. Can significantly inhibit IL-1β, TLR2 and NFκB levels. | [30](#_ENREF_30) |
|  | *Centella asiatica* (L.) Urb. | Extracts | I. Can promote wound healing after acne laser treatment. | [31](#_ENREF_31) |
|  | Curcumin from Turmeric (*Curcuma longa*) | Curcumin | I. Can regulate sebum hypersecretion in patients.  II. Can inhibit acne-induced ROS and pro-inflammatory cytokines showing anti-inflammatory activity.  III. Can inhibit P. acnes activity. | [28](#_ENREF_28),[32](#_ENREF_32),[33](#_ENREF_33) |
|  | *Elaeagnus rhamnoides* (L.) A.Nelson.  (Syn.*Hippophae rhamnoides* L.) | Phenolic compounds | I. Can inhibit 5-alpha reductase, reduce sebum secretion, and treat mild to moderate acne. | [34](#_ENREF_34),[35](#_ENREF_35) |
|  | *Eucommia ulmoides* Oliv. | Ethanol extracts | I. Can inhibit the secretion of pro-inflammatory cytokines such as TNF-α, IL-8 and IL-1β and P. acnes. | [36](#_ENREF_36) |
|  | *Ginkgo biloba* L. | Seed extracts | I. Has antibacterial activity. | [37](#_ENREF_37) |
|  | *Glycyrrhiza glabra* L. | Licochalcone A | I. Can inhibit NLRP3 inflammatory vesicles.  II. Can inhibit the production of ROS and inflammatory factors induced by P. acnes. | [38](#_ENREF_38) |
|  | *Hypericum perforatum* L. | Hypericin | I. Photodynamic inactivation of P. acnes biofilm by different concentrations of photosensitizers combined with weak lasers of different energies. | [39](#_ENREF_39) |
|  | *Momordica charantia* L. | Total phenolic extracts | I. Can inhibit IL-8, IL-1β and TNF-α levels. | [40](#_ENREF_40) |
|  | *Nigella sativa* L. | Thymoquinone | I. Can improve acne symptoms such as acne vulgaris, papules and pustules. | [41](#_ENREF_41) |
|  | *Ocimum tenuiflorum* L. (Syn.*Ocimum sanctum* L.) | Fermented Basil | I. Can inhibit Staphylococcus aureus, Staphylococcus epidermidis, and P. acnes. | [42](#_ENREF_42) |
|  | *Panax ginseng* C.A.Mey. | Panaxynol | I. Can inhibit the activity of Propionibacterium acnes and improve the symptoms of acne in the early and middle stages. | [43](#_ENREF_43) |
|  | *Psidium guajava* L. | Leaf extracts | I. Can inhibit P. acnes, Staphylococcus aureus and Staphylococcus epidermidis. | [44](#_ENREF_44) |
|  | *Rhodiola crenulata* (Hook.f. & Thomson) H.Ohba | Salidroside | I. Can disrupt the biofilm of P. acnes. | [45](#_ENREF_45) |
|  | *Rubia cordifolia* L. | Root extracts | I. Can inhibit the production of ROS and pro-inflammatory cytokines induced by P. acnes. | [28](#_ENREF_28) |
|  | *Salvia miltiorrhiza* Bunge | Tanshinone | I. Can reduce serum IL-8, IL-6, IL-1β and TNF-α levels. | [46](#_ENREF_46) |
|  | *Schisandra chinensis*  (Turcz.) Baill. | Schisandrin A, B, and C | I. Can inhibit the release of inflammatory cytokines and the expression of NFκB. Schisandrin A can inhibit the activation of JNK induced by Propionibacterium acnes, Schisandrin B can inhibit the activation of p38 induced by Propionibacterium acnes, and Schisandrin C can inhibit the phosphorylation of JNK, ERK and p38.  II. Can effectively inhibit IL-1β secretion by inhibiting the activation of NLRP3 inflammatory vesicles induced by Propionibacterium acnes. | [47](#_ENREF_47),[48](#_ENREF_48) |
|  | *Scutellaria baicalensis* Georgi | Wogonin | I. Can inhibit the upregulation of IL-1β and IL-8 levels induced by Propionibacterium acnes through inhibition of MAPK and NFκB signaling pathways. | [49](#_ENREF_49) |
|  | *Syzygium aromaticum* (L.) Merr. & L.M.Perry.  (Syn. *Eugenia caryophyllus* (Spreng.)  Bullock & S.G.Harrison) | Eugenol | I. Can inhibit the expression of TNF-α, IL-1β, IL-8 and MMP-9 to suppress the inflammatory response induced by Propionibacterium acnes. | [50](#_ENREF_50) |
|  | *Terminalia chebula* Retz. | Extracts | I. Has inhibitory effect on lipase activity of Propionibacterium acnes. | [51](#_ENREF_51) |
|  | *Tribulus terrestris* L. | Extracts | I. Can reduce inflammatory and non-inflammatory acne symptoms. | [52](#_ENREF_52) |
|  | *Vitis vinifera* L. | Resveratrol | I. Can reduce lesion area and acne grading score. | [53](#_ENREF_53) |
|  | *Zingiber officinale* Roscoe | Hydrogel containing this plant extracts | I. Has good therapeutic effect on acne. | [54](#_ENREF_54) |
| **Allergic contact dermatitis** | *Cannabis sativa* L. | Delta(9)-tetrahydrocannabinol (THC) | I. Can reduce the production of pro-inflammatory mediators and reduce the symptoms of allergic contact dermatitis. | [55](#_ENREF_55) |
|  | *Scutellaria baicalensis* Georgi | Aqueous extracts | I. Can reduce mast cell infiltration and inhibit IgE and IL-4, IFN-γ and TNF-α production. | [56](#_ENREF_56) |
|  | *Trigonella foenum‐graecum* L. | Extracts | I. Can treat Th2-induced atopic dermatitis by enhancing Th1 differentiation. | [57](#_ENREF_57) |
| **Psoriasis** | *Allium sativum* L. | diallyl sulfide | I. Can interrupt NFκB transcription factor. | [58](#_ENREF_58) |
|  | *Caesalpinia bonduc* (L.) Roxb. | hydroalcoholic extracts | I. Can show antiproliferant activity in HaCaT cells and lipoxygenase inhibition assay. | [59](#_ENREF_59) |
|  | *Azadirachta indica* A. Juss. | Nimbolide | I. Can significantly improve the expression of inflammatory and proliferative mediators.  II. Can improve the size and severity of psoriasis. | [60](#_ENREF_60) |
|  | *Cannabis sativa* L. | Cannabinoids | I. Can act on cannabinoids receptors to inhibit keratinocyte proliferation in a concentration-dependent manner. | [61](#_ENREF_61) |
|  | *Centella asiatica* (L.) Urb. | Madecassoside | I. Can inhibit keratinocyte proliferation.  II. Can reduce the number of Th17 cells, and regulate the IL-23/IL-17 axis.  III. Can reduce skin inflammation. | [62](#_ENREF_62) |
|  | *Centella asiatica* (L.) Urb. | Asiatic acid | I. Can inhibit elevated levels of IL-17A and IL-23 and reduce mast cell infiltration. | [63](#_ENREF_63) |
|  | Curcumin from Turmeric (*Curcuma longa*) | Curcumin | I. Can reduce erythema and sclerosis of skin lesions, and slow down disease progression. | [64](#_ENREF_64) |
|  | *Elaeagnus rhamnoides* (L.) A.Nelson.  (Syn.*Hippophae rhamnoides* L.) | Sea buckthorn oil | I. Can inhibit ROS levels and down-regulate NFκB and pro-inflammatory cytokines such as IL-1β and IL-6. | [65](#_ENREF_65) |
|  | *Glycyrrhiza glabra* L. | Glycyrrhizin | I. Can inhibit IL-17A and IFN-γ expression.  II. Can upregulate SIPT1 to inhibit cell proliferation, and STAT3 expression. | [66](#_ENREF_66) |
|  | *Glycyrrhiza glabra* L. | Glabridin | I. Can significantly inhibit the mRNA expression of IL-6, IL-1β, IL-17A, IL-22 and IL-23. | [67](#_ENREF_67) |
|  | *Hypericum perforatum* L. | Hypericin | I. Can inhibit the secretion of IL-17A-related factors by regulating MAPK/STAT3 pathway.  II. Can reduce the inflammatory symptoms of psoriasis. | [68](#_ENREF_68) |
|  | *Morus alba* L. | Bark extracts | I. Can inhibit NFκB activation and IL-17A production to exert anti-inflammatory effects. | [69](#_ENREF_69) |
|  | *Nigella sativa* L. | Seed ethanol extracts | I. Has good anti-proliferative activity. | [70](#_ENREF_70) |
|  | *Panax notoginseng*  (Burk.) FH Chen | Panax notoginseng gel | I. Can reduce the degree of inflammation.  II. Can decrease the expression of inflammatory mediators.  III. Can significantly reduce the level of intercellular adhesion molecule ICAM-1. | [71](#_ENREF_71) |
|  | *Rubia cordifolia* L. | Ethyl acetate extracts | I. Can induce keratinocyte differentiation and anti-proliferative activity. | [72](#_ENREF_72) |
|  | *Salvia miltiorrhiza* Bunge | Cryptotanshinone | I. Can inhibit psoriatic epidermal proliferation by inhibiting STAT3 activation. | [73](#_ENREF_73) |
|  | *Salvia miltiorrhiza* Bunge | Tanshinone IIA | I. Can inhibit keratinocyte proliferation.  II. Can arrest the cell cycle in S phase.  III. Can induce apoptosis via caspase pathway. | [74](#_ENREF_74) |
|  | *Schisandra chinensis*  (Turcz.) Baill. | Gomisin M2 | I. Can reduce gene expression of inflammation-associated cytokines and chemokines and inhibit inflammatory signaling pathways. | [75](#_ENREF_75) |
|  | *Scutellaria baicalensis* Georgi | Baicalin | I. Can inhibit the IL-17/IL-23 axis to inhibit psoriatic skin inflammation.  II. Can inhibit STAT3/NFκB pathway to inhibit keratin-forming cell proliferation and inflammatory factor expression. | [76](#_ENREF_76),[77](#_ENREF_77) |
|  | *Uncaria tomentosa* (Willd. ex Schult.) DC. | Extracts | I. Can relieve symptoms of skin inflammation, itching and pain. | [24](#_ENREF_24) |
|  | *Withania somnifera* (L.) Dunal | Fatty acids from the seeds | I. Can inhibit the release of pro-inflammatory cytokines and reduce the extent of psoriasis lesions. | [78](#_ENREF_78) |
|  | *Zingiber officinale* Roscoe | Phenols in methanol extracts | I. Can inhibit cell adhesion and inflammation. | [79](#_ENREF_79) |
| **Eczema** | *Glycyrrhiza glabra* L. | Ammonium glycyrrhizinate | I. Can reduce inflammatory response and edema on the wounded surface. | [80](#_ENREF_80) |
|  | *Hypericum perforatum* L. | Hypericin | I. Can reduce the production of free radicals in the skin. | [81](#_ENREF_81) |
|  | *Nigella sativa* L. | Thymoquinone | I. Can inhibit the Akt/NFκB pathway and reduce the production of ROS and pro-inflammatory regulators. | [82](#_ENREF_82) |
|  | *Uncaria tomentosa* (Willd. ex Schult.) DC. | Extracts | I. Can relieve skin inflammation, pruritus and pain. | [24](#_ENREF_24) |
| **Androgenetic alopecia** | *Centella asiatica* (L.) Urb. | Centella asiatica titrated extracts | I. Can enhance hair induction in hair papilla cells by inhibiting STAT signaling pathway. | [83](#_ENREF_83) |
|  | *Panax ginseng* C.A.Mey. | Ginsenoside Ro | I. Can inhibit 5α reductase and promote hair regrowth. | [84](#_ENREF_84) |
|  | *Scutellaria baicalensis* Georgi | Baicalin | I. Can inhibit androgen receptor activation and promote hair papilla cell proliferation. | [85](#_ENREF_85) |
|  | *Vitis vinifera* L. | Proanthocyanidins | I. Can regulate hair follicle cell proliferation and hair growth cycle. | [86](#_ENREF_86) |

**Supplementary Table 3** Summary of mechanisms of action of plant adaptogens related to skin health

| **Function** | **Plant** | **Compound** | **Treatment** | **Ref** |
| --- | --- | --- | --- | --- |
| **Anti-aging and Anti-photoaging** | *Allium sativum* L. | Organosulfur compounds | I. Can scavenge ROS.  II. Can enhance antioxidant enzymes.  III. Can protect DNA against radicals.  IV. Can defend against UV-induced damage. | [87](#_ENREF_87),[88](#_ENREF_88) |
|  | *Allium sativum* L. | Allicin | I. Leukocyte elastase inhibitor with anti-premature aging potential. | [89](#_ENREF_89) |
|  | *Andrographis paniculata* (Burm.f.) Nees | Ethanol extracts | I. Can promote human epidermal stem cell proliferation by upregulating the expression of integrin 1 and vascular endothelial growth factor.  II. Can promote type I collagen production by fibroblasts. | [90](#_ENREF_90) |
|  | *Azadirachta indica* A. Juss. | Ethanol extracts | I. Can promote type I collagen and elastin production and down-regulate ROS, AP-1 and MAPK expression.  II. Topical application can prevent wrinkle production caused by UV exposure. | [91](#_ENREF_91) |
|  | *Cannabis sativa* L. | Cannabinoid | I. Can protect keratinocytes from UV-induced oxidative damage. | [92](#_ENREF_92) |
|  | *Centella asiatica* (L.) Urb. | Asiaticoside | I. Can promote the synthesis of type I and type III collagen. | [93](#_ENREF_93) |
|  | *Codonopsis pilosula* (Franch.) Nannf. | Aqueous extracts | I. Can affect aging-related metabolic pathways. | [94](#_ENREF_94) |
|  | Curcumin from Turmeric (*Curcuma longa*) | Curcumin | I. Can improve skin condition and prevent skin photoaging by inhibiting the activation of gelatinase caused by UV rays. | [95](#_ENREF_95) |
|  | *Elaeagnus rhamnoides* (L.) A.Nelson.  (Syn.*Hippophae rhamnoides* L.) | Alcoholic extracts | I. Can promote the synthesis of procollagen by fibroblasts.  II. Can decrease UVB-induced MMP-1 expression and IL-1β, IL-6 and COX-2 production. | [96](#_ENREF_96) |
|  | *Eleutherococcus sessiliflorus* (Rupr. & Maxim.) S.Y. Hu (syn *Acanthopanax sessiliflorus*  (Rupr. & Maxim.) Seem.) | Stem extracts | I. Can significantly reduce lymphocyte DNA damage and improve nematode survival under oxidative stress conditions. | [97](#_ENREF_97) |
|  | *Emblica officinalis* Gaetrn. | Phenolic compounds | I. Has high antioxidant activity and moderate anti-collagenase activity. | [98](#_ENREF_98) |
|  | *Eucommia ulmoides* Oliv. | Chlorogenic acid, Geniposidic Acid, Aucubin, quercetin | I. Can reduce the oxidative damage caused by H2O2. | [99](#_ENREF_99) |
|  | *Ginkgo biloba* L. | Ginkgolide A and bilobalide | I. Can inhibit ROS production and MMP-1 degradation, and has good pro-collagen activity. | [100](#_ENREF_100) |
|  | *Glycyrrhiza glabra* L. | Licochalcone A | I. Can activate glycolytic pathway and regulate the level of ROS production, which has anti-aging effect. | [101](#_ENREF_101) |
|  | *Hibiscus cannabinus* L. | Leaf extracts | I. Can inhibit collagenase and elastase activity exhibiting anti-aging effects. | [102](#_ENREF_102) |
|  | *Hypericum perforatum* L. | Methanol extracts | I. Can improve oxidative stress state and pro-inflammatory cascade response associated with aging. | [103](#_ENREF_103) |
|  | *Lepidium meyenii* Walp. (Syn. *Lepidium*  *peruvianum* G.Chacón) | Phenolic compounds | I. Can reduce oxidative stress damage as well as prevent inflammation produced by UV damage to the skin and increase the number of cells. | [104](#_ENREF_104) |
|  | *Marantodes pumilum* (Blume) Kuntze.  (Syn.*Labisia pumila* (Blume) Mez) | Extracts | I. Has antioxidant and collagen-promoting activities. | [105](#_ENREF_105) |
|  | *Morus alba* L. | Ethyl acetate extracts | I. Has strong DNA damage protection and high antioxidant activity. | [106](#_ENREF_106) |
|  | *Nelumbo nucifera* Gaertn. | Stamen ethanol extracts | I. Has antioxidant and collagenase inhibiting effects. | [107](#_ENREF_107) |
|  | *Nigella sativa* L. | Seed oil | I. Can inhibit AGEs, collagen cross-link production, as well as inhibit collagenase and elastase activities. | [108](#_ENREF_108) |
|  | *Ocimum tenuiflorum* L. (Syn.*Ocimum*  *sanctum* L.) | Ethanol extracts | I. Has strong antioxidant activity. | [109](#_ENREF_109) |
|  | *Oplopanax elatus* (Nakai) Nakai (Syn.  *Echinopanax elatum* Nakai) | Sesquiterpenoids | I. Can inhibit UVB-induced production of cellular inflammation. | [110](#_ENREF_110) |
|  | *Panax ginseng* C.A.Mey. | Ginsenoside Rh20(s) isomers | I. Can inhibit UVB-induced ROS production and MMP-2 activity. | [111](#_ENREF_111) |
|  | *Panax notoginseng* (Burk.) FH Chen | Panax notoginseng fermented extracts | I. Can promote the expression of fibroblast type I collagen, fibrillin-1, and elastin. | [112](#_ENREF_112) |
|  | *Prunella vulgaris* L. | Extracts | I. Can prevent UVB-induced photoaging of fibroblasts and promote the synthesis of type I collagen precursors via NFκB, MAPKs, AP-1 and TGF-β/Smad signaling pathways. | [113](#_ENREF_113) |
|  | *Rhodiola crenulata* (Hook.f. & Thomson)  H.Ohba | Salidroside, Rhodiolin | I. Can effectively improve UVB radiation-induced apoptosis and regulate the production of IL-6 and TNF-α inflammatory cytokines. | [114](#_ENREF_114) |
|  | *Rhodiola rosea* L. [today classed as *Sedum roseum* (L.) Scop.] | Salidroside | I. Can exert anti-UVB-induced photoaging effects through antioxidant effects and inhibition of MMP-1 and pro-inflammatory cytokine production. | [115](#_ENREF_115) |
|  | *Salvia miltiorrhiza* Bunge | Salvianolic acid B | I. Can upregulate the expression of type I collagen, type III collagen and elastin, and downregulate MMP-1 expression. | [116](#_ENREF_116) |
|  | *Schisandra chinensis* (Turcz.) Baill. | Deoxyschisandrin (SA) and schisandrin B (SB) | I. Can ameliorate UVB-induced loss of cell viability and death produced by inhibiting UVB-induced ROS production and DNA damage. | [117](#_ENREF_117) |
|  | *Scutellaria baicalensis* Georgi | Ethanol extracts | I. Can reduce ROS production, inhibit DNA damage and activate Nrf2/HO-1 signaling pathway to exert antioxidant effects. | [118](#_ENREF_118) |
|  | *Syzygium aromaticum* (L.) Merr. & L.M.Perry.  (Syn. *Eugenia caryophyllus* (Spreng.)  Bullock & S.G.Harrison) | Ethanol extracts | I. Can activate Nrf2/ARE signaling pathway and exhibit antioxidant activity.  II. Can increase type I pre-collagen and elastin levels through Smad signaling pathway to reduce wrinkle generation and improve UVB-induced photoaging. | [119](#_ENREF_119) |
|  | *Terminalia chebula* Retz. | Water extracts | I. Has free radical scavenging activity. | [120](#_ENREF_120) |
|  | *Tinospora sinensis* (Lour.) Merr.  (Syn.*Tinospora cordifolia* (Willd.) Miers,  Syn *Tinospora malabarica* (Lam.) Hook. f.& Thomson) | Leaf extracts | I. Can promote DNA synthesis and cell proliferation, and inhibit p21 expression and senescence. | [121](#_ENREF_121) |
|  | *Trigonella foenum‐graecum* L. | Ethanol extracts | I. Can inhibit collagenase activity. | [122](#_ENREF_122) |
|  | *Uncaria tomentosa* (Willd. ex Schult.) DC. | Water extracts | I. Can upregulate DNA repair and reduce skin cell death caused by UV exposure. | [123](#_ENREF_123) |
|  | *Vitis vinifera* L. | Seed extracts | I. Can improve skin scales, skin wrinkles, skin smoothness, and skin roughness index. | [124](#_ENREF_124) |
|  | *Withania somnifera* (L.) Dunal | Root extracts | I. Can promote DNA synthesis/proliferation of mesenchymal stem cells and slow down aging. | [125](#_ENREF_125) |
|  | *Zingiber officinale* Roscoe | Methanol extracts | I. Can improve oxidative stress state and pro-inflammatory cascade response associated with aging. | [103](#_ENREF_103) |
| **Anti-bacterial and Anti-fungal** | *Allium sativum* L. | diallyl sulphide(DAS) and diallyl disulphide(DADS) | I. Can significantly inhibit proteinase, phospholipase secretion and dimorphism in candida albicans. | [126](#_ENREF_126) |
|  | *Ajuga turkestanica* (Regel) Briq. | Volatile oil | I. Has strong antibacterial activity against different bacteria and fungi. | [127](#_ENREF_127) |
|  | *Alstonia scholaris* (L.) R. Br. | Methanol extracts | I. Has good antibacterial activity. | [128](#_ENREF_128) |
|  | *Aegle marmelos* (L.) Corrêa | Leaf extracts | I. Has anti-dermal fungal activity. | [129](#_ENREF_129) |
|  | *Andrographis paniculata* (Burm.f.) Nees | Methanol extracts | I. Has a strong inhibitory effect on Gram-positive bacteria. | [130](#_ENREF_130) |
|  | *Annona muricata* L. | Extracts | I. Has antibacterial effect on both Staphylococcus aureus and Escherichia coli. | [131](#_ENREF_131) |
|  | *Asparagus racemosus* Willd. | Root ethanol extracts | I. Has inhibitory activity against Malassezia. | [132](#_ENREF_132) |
|  | *Azadirachta indica* A. Juss. | Extracts | I. Shows good antibacterial activity. | [133](#_ENREF_133) |
|  | *Bacopa monnieri* (L.) Wettst. | Extracts | I. Has antifungal activity. | [134](#_ENREF_134) |
|  | *Cannabis sativa* L. | Leaf extracts | I. Has antibacterial activity. | [135](#_ENREF_135) |
|  | Curcumin from Turmeric (*Curcuma longa*) | Curcumin | I. Coupled chitosan microspheres have good antibacterial activity. | [136](#_ENREF_136) |
|  | *Elaeagnus rhamnoides* (L.) A.Nelson.  (Syn.*Hippophae rhamnoides* L.) | Leaf extracts | I. Has antibacterial activity. | [137](#_ENREF_137) |
|  | *Eleutherococcus senticosus* (Rupr. & Maxim.)Maxim. | Chiisanogenin | I. Has antibacterial activity against both Gram-positive G+ and Gram-negative G- bacteria. | [138](#_ENREF_138) |
|  | *Emblica officinalis Gaetrn.* | Fruit extracts and ethanol fraction | I. Can disrupt the biofilm structure of Streptococcus pyogenes to exert antibacterial effect and inhibit the production of dental caries. | [139](#_ENREF_139) |
|  | *Eucommia ulmoides* Oliv. | Ethanol extracts | I. Can inhibit both bacteria and fungi. | [140](#_ENREF_140) |
|  | *Ginkgo biloba* L. | Seed protein fraction | I. Has antibacterial activity. | [141](#_ENREF_141) |
|  | *Glycyrrhiza glabra* L. | Root extracts | I. Exhibited antibacterial activity against both Gram-positive and Gram-negative bacteria. | [142](#_ENREF_142) |
|  | *Marantodes pumilum* (Blume) Kuntze.  (Syn.*Labisia pumila* (Blume) Mez) | Water extracts | I. Has antibacterial activity. | [143](#_ENREF_143) |
|  | *Momordica charantia* L. | Triterpenoids | I. Has antibacterial activity. | [144](#_ENREF_144) |
|  | *Morus alba* L. | Fruit extracts | I. Has antibacterial activity. | [145](#_ENREF_145) |
|  | *Murraya koenigii* (L.) Spreng. | Volatile oil | I. Can exert antibacterial activity through a membrane inhibition mechanism. | [146](#_ENREF_146) |
|  | *Nelumbo nucifera* Gaertn. | Volatile oil | I. Has antibacterial activity. | [147](#_ENREF_147) |
|  | *Nigella sativa* L. | Methanol extracts of healing tissue | I. Has more obvious antibacterial activity. | [148](#_ENREF_148) |
|  | *Panax ginseng* C.A.Mey. | Triterpene Saponin | I. Has good antibacterial activity. | [149](#_ENREF_149) |
|  | *Piper longum* L. | Piperlonguminine, Piperine | I. Has antibacterial activity. | [150](#_ENREF_150) |
|  | *Psidium guajava* L. | Extracts | I. Has antibacterial activity. | [151](#_ENREF_151) |
|  | *Salvia miltiorrhiza* Bunge | Cryptotanshinone | I. Can inhibit the formation of biofilm of Staphylococcus epidermidis. | [152](#_ENREF_152) |
|  | *Scutellaria baicalensis* Georgi | Baicalin | I. Can inhibit the biofilm activity of Pseudomonas aeruginosa.  II. Can inhibit the quorum sensing QS controlled virulence size and exert antibacterial activity. | [153](#_ENREF_153) |
|  | *Solanum torvum* SW. | Leaf and fruit ethanol extracts | I. Can inhibit the biofilm of the fungus. | [154](#_ENREF_154) |
|  | *Syzygium aromaticum* (L.) Merr. & L.M.Perry.  (Syn. *Eugenia caryophyllus* (Spreng.)  Bullock & S.G.Harrison) | Volatile oil | I. Can exert antifungal activity and inhibit the formation of its biofilm. | [155](#_ENREF_155) |
|  | *Terminalia chebula* Retz. | Ethanol extracts | I. Can inhibit the growth of oral bacteria and help prevent periodontal disease induced by plaque bacteria. | [156](#_ENREF_156) |
|  | *Tinospora sinensis* (Lour.) Merr.  (Syn.*Tinospora cordifolia* (Willd.) Miers,  Syn *Tinospora malabarica* (Lam.) Hook. f.& Thomson) | Methanol extracts | I. Showed higher antibacterial activity than the aqueous extract. | [157](#_ENREF_157) |
|  | *Zingiber officinale* Roscoe | Volatile oil | I. Has inhibitory effect on Pseudomonas aeruginosa activity. | [158](#_ENREF_158) |
| **Anti-inflammatory** | *Andrographis paniculata* (Burm.f.) Nees | Andrographolide | I. Can significantly restore skin barrier functions and reduce inflammation by preventing NFκB, c-Fos activation and modulating filaggrin, involucrin and loricrin expressions. | [159](#_ENREF_159) |
|  | *Albizia julibrissin* Durazz. | Methanol extracts | I. Can inhibit NO production. | [160](#_ENREF_160) |
|  | *Alstonia scholaris* (L.) R. Br. | Alkaloids | I. Has COX-1, COX-2 and 5-LOX inhibitory effects. | [161](#_ENREF_161) |
|  | *Aegle marmelos* (L.) Corrêa | Dried flower aqueous extracts | I. Can inhibit foot swelling in rats. | [162](#_ENREF_162) |
|  | *Allium sativum* L. | Sulfur-containing compounds | I. Can inhibit NO and PGE-2 production and suppress TNF-α, IL-1β and IL-6 expression. | [163](#_ENREF_163) |
|  | *Annona muricata* L | Aqueous extracts | I. Can significantly reduce histological parameters of inflamed ear and ear edema. | [164](#_ENREF_164) |
|  | *Aralia elata*  (Miq) Seem. | Triterpene Saponins | I. Can inhibit NFκB signaling pathway and activate PPAR activity, and dose-dependently inhibit the expression of TNF-α, iNOS and COX-2. | [165](#_ENREF_165) |
|  | *Argyreia nervosa* (Burm. f.) Bojer (syn.*Argyreia speciosa* (L. f.) Sweet) | Ethanol extracts | I. Can inhibit foot swelling and suppress inflammatory cell aggregation in mice. | [166](#_ENREF_166) |
|  | *Asparagus racemosus* Willd. | Root extracts liposome | I. Can inhibit TNF-1 production. | [167](#_ENREF_167) |
|  | *Azadirachta indica* A. Juss. | Pericarp carbon tetrachloride extracts | I. Can reduce the number of twisting and reduce foot swelling in experimental animals. | [168](#_ENREF_168) |
|  | *Boerhaavia diffusa* Brandegee | Methanol extracts | I. Has the effect of inhibiting the activity of COX-1 and COX-2. | [169](#_ENREF_169) |
|  | *Bryonia alba* L. | Root ethyl acetate extracts | I. Can inhibit foot swelling in mice. | [170](#_ENREF_170) |
|  | *Butea monosperma* (Lam.) Taub. | Flower 70% ethanol extracts | I. Can inhibit the secretion of IL-1β, IL-6, IL-8 and MMP-1, -2, -9, -10. | [171](#_ENREF_171) |
|  | *Caesalpinia bonduc* (L.) Roxb. | Diterpene compounds | I. Can inhibit NO production. | [172](#_ENREF_172) |
|  | *Cannabis sativa* L. | Cannabidiol（CBD） | I. Can down-regulate the production of pro-inflammatory cytokines. | [173](#_ENREF_173) |
|  | *Carum carvi* L. | Seed Oil | I. Can inhibit NO production and exert anti-inflammatory effects. | [174](#_ENREF_174) |
|  | *Centella asiatica* (L.) Urb. | Extracts | I. Can exert anti-inflammatory activity. | [175](#_ENREF_175) |
|  | *Cicer arietinum* L. | Extracts | I. Can inhibit COX-1/12-LOX and exhibit anti-inflammatory activity. | [176](#_ENREF_176) |
|  | *Cnestis ferruginea* Vahl ex DC. | Root methanol extracts | I. Can inhibit the inflammatory response by suppressing the release of vasoactive substances (histamine, 5-hydroxytryptamine, kinins) and prostaglandins. | [177](#_ENREF_177) |
|  | *Codonopsis pilosula* (Franch.) Nannf. | Polysaccharides | I. Can inhibit NFκB pathway activation and reduce TNF-α, IL-6 inflammatory cytokine expression. | [178](#_ENREF_178) |
|  | *Curculigo orchioides* Gaertn. | Extracts | I. Can inhibit mast cell degranulation and derived metaplasia. | [179](#_ENREF_179) |
|  | Curcumin from Turmeric (*Curcuma longa*) | Curcumin | I. Can inhibit the expression of MMP-1/3 by inhibiting MAPK-p38/JNK pathway. | [180](#_ENREF_180) |
|  | *Elaeagnus rhamnoides* (L.) A.Nelson.  (Syn.*Hippophae rhamnoides* L.) | Sea buckthorn oil | I. Can inhibit NFκB pathway and suppress reactive nitrogen and pro-inflammatory cytokines to exert anti-inflammatory effects. | [65](#_ENREF_65) |
|  | *Eleutherococcus senticosus* (Rupr. & Maxim.) Maxim. | Eleutheroside B | I. Can inhibit COX-2 expression. | [181](#_ENREF_181) |
|  | *Eleutherococcus sessiliflorus* (Rupr. & Maxim.) S.Y. Hu (syn *Acanthopanax sessiliflorus*  (Rupr. & Maxim.) Seem.) | Triterpenoids | I. Can inhibit NO production and has anti-inflammatory activity. | [182](#_ENREF_182),[183](#_ENREF_183) |
|  | *Emblica officinalis* Gaetrn. | Methanol extracts | I. Can reduce inflammatory cytokines such as IL-1β and TNF-α, and reduce foot swelling in rats. | [184](#_ENREF_184) |
|  | *Eucommia ulmoides* Oliv. | Water extracts | I. Has significant inhibitory effect on COX-2, TNF-α and NO. | [185](#_ENREF_185) |
|  | *Fagopyrum esculentum* Moench | Ethanol extracts | I. Has significant anti-inflammatory activity and down-regulates the expression of inflammatory factors. | [186](#_ENREF_186) |
|  | *Ginkgo biloba* L. | Ginkgo biloba leaf polysaccharide | I. Can exert anti-inflammatory effects through TLR4/NFκB signaling pathway and reduce the production of inflammatory cytokines. | [187](#_ENREF_187) |
|  | *Glycyrrhiza glabra* L. | Ethyl acetate extracts | I. Has good anti-inflammatory activity. | [188](#_ENREF_188) |
|  | *Hebanthe eriantha* (Poir.) Pedersen  (Syn.*Pfaffia paniculata* (Mart.) Kuntze) | Total Saponin, Total Flavonoid | I. Can inhibit the production of inflammatory mediators and reduce the inflammatory process. | [189](#_ENREF_189) |
|  | *Hibiscus cannabinus* L. | Extracts | I. Has anti-inflammatory activity. | [190](#_ENREF_190) |
|  | *Holoptelea integrifolia* Planch. | Water extracts | I. Has a significant inhibitory effect on foot swelling in mice. | [191](#_ENREF_191) |
|  | *Hypericum perforatum* L. | Extracts | I. Can inhibit NO, TNF-α, IL-1β production. | [192](#_ENREF_192) |
|  | *Lagenaria siceraria* (Molina) Standl. | Extracts | I. Can inhibit IL-8 inflammatory factor secretion. | [193](#_ENREF_193) |
|  | *Lepidium meyenii* Walp. (Syn. *Lepidium*  *peruvianum* G.Chacón) | Polysaccharides | I. Can inhibit NO production and exert anti-inflammatory activity. | [194](#_ENREF_194) |
|  | *Marantodes pumilum* (Blume) Kuntze.  (Syn.*Labisia pumila* (Blume) Mez) | Extracts | I. Can inhibit IL-1α, IL-1β, IL-6, IL-8, TNF-α and PGE(2) secretion. | [195](#_ENREF_195) |
|  | *Melilotus officinalis* (L.) Pall. | Extracts | I. Can inhibit NO, TNF-ff, IL-6 secretion. | [196](#_ENREF_196) |
|  | *Momordica charantia* L. | Ethyl acetate extracts | I. Has the effect of inhibiting the production of pro-inflammatory cytokines and MMP-9. | [197](#_ENREF_197) |
|  | *Morus alba* L. | Extracts | I. Can inhibit hyaluronidase activity and the secretion of IL-6 and TNF-α. | [198](#_ENREF_198) |
|  | *Mucuna pruriens* (L.) DC. | Essential oil | I. Can inhibit foot swelling in mice. | [199](#_ENREF_199) |
|  | *Murraya koenigii* (L.) Spreng. | Petroleum ether, ethyl acetate, chloroform and ethanol extracts | I. All have anti-inflammatory activity. | [200](#_ENREF_200) |
|  | *Nelumbo nucifera* Gaertn. | Neferine | I. Can significantly reduce skin barrier damage, scratching response.  II. Can reduce NFκB signaling pathway expression as well as inhibit inflammatory factor expression. | [10](#_ENREF_10) |
|  | *Nigella sativa* L. | Aqueous extracts | I. Can reduce the symptoms of foot swelling in mice. | [201](#_ENREF_201) |
|  | *Ocimum tenuiflorum* L. (Syn.*Ocimum*  *sanctum* L.) | Fermentation products | I. Can inhibit the expression of NFκB. | [42](#_ENREF_42) |
|  | *Oplopanax elatus* (Nakai) Nakai (Syn.  *Echinopanax elatum* Nakai) | Aqueous extracts | I. Can inhibit the production of pro-inflammatory cytokines such as IL-6 and TNF-α.  II. Can inhibit the activation of p38MAPK, ERK and c-jun amino-terminal kinase. | [202](#_ENREF_202) |
|  | *Panax ginseng* C.A.Mey. | Ginsenoside Re | I. Can inhibit the level of inflammatory mediators such as TNF-α and IL-1β. | [203](#_ENREF_203) |
|  | *Panax notoginseng* (Burk.) FH Chen | Panax notoginseng total saponin | I. Can inhibit the expression of NFκB and MAPK and the expression of pro-inflammatory cytokines. | [204](#_ENREF_204) |
|  | *Pandanus odorifer* (Forssk.) Kuntze  (Syn.*Pandanus odoratissimus* L.f.) | Methanol extracts | I. Can inhibit foot swelling in rats. | [205](#_ENREF_205) |
|  | *Paullinia cupana* Kunth | Seed extracts | I. Has an inhibitory effect on TNF-α. | [206](#_ENREF_206) |
|  | *Putranjiva roxburghii* Wall. (Syn. *Drypetes roxburghii* (Wall.) Hurus.) | Ether extracts | I. Has some inhibitory effects on ear swelling, foot swelling and anal swelling. | [207](#_ENREF_207) |
|  | *Piper longum* L. | Extracts | I. Has significant anti-inflammatory activity and inhibits foot swelling in mice. | [208](#_ENREF_208) |
|  | *Prunella vulgaris* L. | Ethanol extracts | I. Can significantly inhibit the production of COX-2, PGE2 and NO. | [209](#_ENREF_209) |
|  | *Psidium guajava* L. | Extracts | I. Can significantly inhibit leukocyte migration and reduces the number of torsions in experimental animals. | [210](#_ENREF_210) |
|  | *Pueraria tuberosa* (Roxb. ex Willd.) DC. | Isoorientin | I. Has the effect of inhibiting the expression of COX-2, TNF-α, IL-6, IL-1β. | [211](#_ENREF_211) |
|  | *Rhaponticum carthamoides* (Willd.)Iljin (Syn.  *Leuzea carthamoides* (Willd.) DC.) | Volatile oil | I. Can decrease the expression of IL-1β, IL-6, and TNF-α. | [212](#_ENREF_212) |
|  | *Rhodiola crenulata* (Hook.f. & Thomson)  H.Ohba | Water extracts | I. Can inhibit the expression of iNOS, MAPK, NFκB and reduce the secretion of NO, IL-6 and IL-1β inflammatory mediators. | [213](#_ENREF_213) |
|  | *Rhodiola rosea* L. [today classed as *Sedum roseum* (L.) Scop.] | Extracts | I. Anti-inflammatory activity is achieved by reducing inflammatory mediators such as TNF-α and regulating signaling pathways such as NFκB. | [214](#_ENREF_214) |
|  | *Rubia cordifolia* L. | Extracts | I. Can inhibit the expression of iNOS and COX-2. | [215](#_ENREF_215) |
|  | *Salvia miltiorrhiza* Bunge | Tanshinone IIA | I. Can inhibit NFκB activation by inhibiting the NIK-IKK pathway and MAPKs (p38, ERK1/2, JNK) pathway. | [216](#_ENREF_216) |
|  | *Schisandra chinensis* (Turcz.) Baill. | Non-polar extracts | I. Has an inhibitory effect on PGE production. | [217](#_ENREF_217) |
|  | *Scutellaria baicalensis* Georgi | Skullcapflavone II | I. Can inhibit TNF-α/IFN-γ-induced production of STAT1, NFκB and p38MAPK phosphorylation.  II. Can inhibit the expression of cellular chemokines associated with atopic dermatitis.  III. Can inhibit the expression of tissue proteinase S (CTSS) associated with pruritus. | [218](#_ENREF_218) |
|  | *Sida cordifolia* L. | Water extracts | I. Can reduce foot swelling and decrease the number of twisting in mice. | [219](#_ENREF_219) |
|  | *Sinomenium acutum* (Thunb.) Rehder &  E.H.Wilson | Extracts | I. Can exhibit inhibitory activity against key inflammation-related enzymes such as COX-1 and COX-2, and has anti-inflammatory effects. | [220](#_ENREF_220) |
|  | *Solanum torvum* SW. | Leaf aqueous extracts | I. Can regulate M1/M2 macrophage polarization by inhibiting NFκB and MAPK signaling pathways. | [221](#_ENREF_221) |
|  | *Sutherlandia frutescens* (L.) R.Br. | Extracts | I. Can reduce foot swelling and decrease the number of twisting in mice. | [222](#_ENREF_222) |
|  | *Syzygium aromaticum* (L.) Merr. & L.M.Perry.  (Syn. *Eugenia caryophyllus* (Spreng.)  Bullock & S.G.Harrison) | Volatile oil | I. Can improve foot swelling in mice and has anti-inflammatory effect. | [223](#_ENREF_223) |
|  | *Terminalia chebula* Retz. | Methanol extracts | I. Can inhibit NO production and suppress the expression of iNOS, COX-2. | [224](#_ENREF_224) |
|  | *Tinospora sinensis* (Lour.) Merr.  (Syn.*Tinospora cordifolia* (Willd.) Miers,  Syn *Tinospora malabarica* (Lam.) Hook. f.& Thomson) | Extracts | I. Can exhibit inhibitory activity against key inflammation-related enzymes such as COX-1 and COX-2. | [220](#_ENREF_220) |
|  | *Tribulus terrestris* L. | Total saponin | I. Can reduce NO and TNF-α production. | [225](#_ENREF_225) |
|  | *Trichilia catigua* A.Juss. | Bark extracts | I. Can reduce the degree of acute inflammation. | [226](#_ENREF_226) |
|  | *Trigonella foenum‐graecum* L. | Ethanol extracts | I. Can inhibit the secretion of MMP-1, MMP-9, IL-6 and IL-8. | [122](#_ENREF_122) |
|  | *Tylophora indica* (Burm. f.) Merr. | Leaf extracts | I. Can inhibit the expression of NFκB and AP-1. | [227](#_ENREF_227) |
|  | *Uncaria tomentosa* (Willd. ex Schult.) DC. | Extracts | I. Can reduce TNF-α levels by inhibiting NFκB and AP-1 activation. | [228](#_ENREF_228) |
|  | *Vitis vinifera* L. | Fruit peel extracts | I. Has an inhibitory effect on NO production. | [229](#_ENREF_229) |
|  | *Withania somnifera* (L.) Dunal | Root extracts | I. Can inhibit neutrophil infiltration and inflammatory factor secretion by modulating NFκB/AP-1 activity. | [230](#_ENREF_230) |
|  | *Zingiber officinale* Roscoe | Water extracts | I. Can inhibit foot swelling and exert anti-inflammatory activity. | [231](#_ENREF_231) |
| **Whitening** | *Annona muricata* L. | Fruit extracts | I. Can reduce skin melanin content. | [232](#_ENREF_232) |
|  | *Azadirachta indica* A. Juss. | [Gedunin](https://www.webofscience.com/wos/woscc/full-record/WOS:000622980300001) | I. Can inhibit tyrosinase TYR activity and reduce melanin production. | [233](#_ENREF_233) |
|  | *Bergenia crassifolia* (L.) Fritsch | Arbutin | I. Has a whitening effect. | [234](#_ENREF_234) |
|  | *Cannabis sativa* L. | N-trans-caffeoyltyramine | I. Has the effect of inhibiting tyrosinase and reducing melanin production. | [235](#_ENREF_235) |
|  | *Centella asiatica* (L.) Urb. | Asiaticoside | I. Can regulate melanin synthesis by inhibiting the expression of tyrosinase mRNA. | [236](#_ENREF_236) |
|  | Curcumin from Turmeric (*Curcuma longa*) | Curcumin | I. Can inhibit melanin production by suppressing tyrosinase activity. | [237](#_ENREF_237) |
|  | *Elaeagnus rhamnoides* (L.) A.Nelson.  (Syn.*Hippophae rhamnoides* L.) | Seed extracts | I. Can inhibit melanogenesis by suppressing tyrosinase activity and TRP-1 expression. | [238](#_ENREF_238) |
|  | *Ginkgo biloba* L. | Ginkgolide B | I. Can inhibit melanin production by inhibiting tyrosinase activity. | [239](#_ENREF_239) |
|  | *Glycyrrhiza glabra* L. | Extracts | I. Can inhibit tyrosinase activity and reduce melanin production. | [240](#_ENREF_240) |
|  | *Hibiscus cannabinus* L. | Leaf extracts | I. Can produce high inhibition of tyrosinase activity and melanin content. | [102](#_ENREF_102) |
|  | *Hypericum perforatum* L. | Methanol extracts | I. Has tyrosinase inhibitory activity. | [241](#_ENREF_241) |
|  | *Momordica charantia* L. | Extracts | I. Has tyrosinase inhibitory activity. | [242](#_ENREF_242) |
|  | *Morus alba* L. | Mulberroside F | I. Can inhibit tyrosinase activity and melanin formation. | [243](#_ENREF_243) |
|  | *Nelumbo nucifera* Gaertn. | Aqueous extracts | I. Has the effect of inhibiting DOPA oxidase. | [244](#_ENREF_244) |
|  | *Panax ginseng* C.A.Mey. | Ginsenoside | I. Can inhibit tyrosinase activity and reduce melanin production. | [245](#_ENREF_245) |
|  | *Panax notoginseng* (Burk.) FH Chen | Total flavonoids | I. Can inhibit tyrosinase and reduce melanogenesis. | [246](#_ENREF_246) |
|  | *Psidium guajava* L. | Leaf methanol extracts | I. Can prevent UV-induced melanogenesis by inhibiting ORAI1 channel and tyrosinase activity. | [247](#_ENREF_247) |
|  | *Rhodiola crenulata* (Hook.f. & Thomson)  H.Ohba | Extracts | I. Can inhibit tyrosinase activity. | [242](#_ENREF_242) |
|  | *Rhodiola rosea* L. [today classed as *Sedum roseum* (L.) Scop.] | Hydroalcoholic extracts | I. Can inhibit melanogenesis by regulating CREB / MITF / tyrosinase pathway. | [248](#_ENREF_248) |
|  | *Schisandra chinensis* (Turcz.) Baill. | Gomisin N | I. Can inhibit melanogenesis by regulating PI3K/Akt and MAPK/ERK signaling pathways. | [249](#_ENREF_249) |
|  | *Scutellaria baicalensis* Georgi | Wogonin | I. Can inhibit melanogenesis and melanosome transport. | [250](#_ENREF_250) |
|  | *Solanum torvum* SW. | Root methanol extracts | I. Can inhibit melanogenesis. | [251](#_ENREF_251) |
|  | *Syzygium aromaticum* (L.) Merr. & L.M.Perry.  (Syn. *Eugenia caryophyllus* (Spreng.)  Bullock & S.G.Harrison) | Volatile oil | I. Can inhibit melanogenesis. | [252](#_ENREF_252) |
|  | *Terminalia chebula* Retz. | Phenolic compounds | I. Can inhibit melanogenesis. | [253](#_ENREF_253) |
|  | *Vitis vinifera* L. | Leaf extracts | I. Has an inhibitory effect on tyrosinase. | [254](#_ENREF_254) |
|  | *Zingiber officinale* Roscoe | Zerumbone | I. Can inhibit MITF-mediated melanogenesis gene expression. | [255](#_ENREF_255) |
| **Anti-hair loss** | *Allium sativum* L. | Flavonoids | I. Can reduce the rate of hair loss and stimulate the growth of new hair. | [256](#_ENREF_256) |
|  | *Centella asiatica* (L.) Urb. | Titrated extracts | I. Can down-regulate STAT expression level in human hair papilla cells and activate hair induction ability. | [83](#_ENREF_83) |
|  | *Glycyrrhiza glabra* L. | Extracts | I. Can inhibit Bax/Bcl2 expression ratio in hair papilla cells and promote hair growth in mice. | [257](#_ENREF_257) |
|  | *Morus alba* L. | Root extracts | I. Can activate β-linkerin in hair follicle papilla cells, induce hair follicle restoration during the anagen phase, and prevent hair loss. | [258](#_ENREF_258) |
|  | *Panax ginseng* C.A.Mey. | Extracts | I. Can promote the proliferation of human hair papilla cells and prolong the hair growth phase. | [259](#_ENREF_259) |
|  | *Trigonella foenum‐graecum* L. | Seed extracts | I. Has anti-hair loss effect. | [260](#_ENREF_260) |

# References

1. Milando R, Friedman A. Cannabinoids: Potential Role in Inflammatory and Neoplastic Skin Diseases. Am J Clin Dermatol. 2019;20(2):167-180.

2. Lee Y, Choi HK, N'Deh KPU, et al. Inhibitory Effect of Centella asiatica Extract on DNCB-Induced Atopic Dermatitis in HaCaT Cells and BALB/c Mice. Nutrients. 2020;12(2):16.

3. Ho PJ, Sung JJ, Cheon KK, Tae HJ. Anti-inflammatory effect of Centella asiatica phytosome in a mouse model of phthalic anhydride-induced atopic dermatitis. Phytomedicine. 2018;43:110-119.

4. Sharma S, Sethi GS, Naura AS. Curcumin Ameliorates Ovalbumin-Induced Atopic Dermatitis and Blocks the Progression of Atopic March in Mice. Inflammation. 2020;43(1):358-369.

5. Gu Y, Wang X, Liu F, et al. Total flavonoids of sea buckthorn (Hippophae rhamnoides L.) improve MC903-induced atopic dermatitis-like lesions. J Ethnopharmacol. 2022;292:115195.

6. Lim H, Son KH, Chang HW, Kang SS, Kim HP. Effects of anti-inflammatory biflavonoid, ginkgetin, on chronic skin inflammation. Biol Pharm Bull. 2006;29(5):1046-1049.

7. Lee H-S, Kim J, Choi HG, Kim E-K, Jun C-D. Licoricidin Abrogates T-Cell Activation by Modulating PTPN1 Activity and Attenuates Atopic Dermatitis In Vivo. J Invest Dermatol. 2021;141(10).

8. Reuter J, Wolfle U, Weckesser S, Schempp C. Which plant for which skin disease? Part 1: Atopic dermatitis, psoriasis, acne, condyloma and herpes simplex. J Dtsch Dermatol Ges. 2010;8(10):788-796.

9. Jin SE, Ha H, Shin H-K, Seo C-S. Anti-Allergic and Anti-Inflammatory Effects of Kuwanon G and Morusin on MC/9 Mast Cells and HaCaT Keratinocytes. Molecules. 2019;24(2).

10. Yang C-C, Hung Y-L, Ko W-C, et al. Effect of Neferine on DNCB-Induced Atopic Dermatitis in HaCaT Cells and BALB/c Mice. Int J Mol Sci. 2021;22(15).

11. Aslam H, Shahzad M, Shabbir A, Irshad S. Immunomodulatory effect of thymoquinone on atopic dermatitis. Mol Immunol. 2018;101:276-283.

12. Ahn S, Siddiqi MH, Aceituno VC, et al. Ginsenoside Rg5:Rk1 attenuates TNF-α/IFN-γ-induced production of thymus- and activation-regulated chemokine (TARC/CCL17) and LPS-induced NO production via downregulation of NF-κB/p38 MAPK/STAT1 signaling in human keratinocytes and macrophages. In Vitro Cell Dev Biol Anim. 2016;52(3):287-295.

13. Han EH, Hwang YP, Choi JH, et al. Psidium guajava extract inhibits thymus and activation-regulated chemokine (TARC/CCL17) production in human keratinocytes by inducing heme oxygenase-1 and blocking NF-kappa B and STAT1 activation. Environ Toxicol Pharmacol. 2011;32(2):136-145.

14. Hashimoto-Hachiya A, Tsuji G, Murai M, Yan XH, Furue M. Upregulation of FLG, LOR, and IVL Expression by Rhodiola crenulata Root Extract via Aryl Hydrocarbon Receptor: Differential Involvement of OVOL1. Int J Mol Sci. 2018;19(6):12.

15. Jeon WJ, Lee JH, Lee JE, et al. Salvianolic Acid A Suppresses DNCB-Induced Atopic Dermatitis-Like Symptoms in BALB/c Mice. Evid-based Complement Altern Med. 2021;2021:9.

16. Buyanravjikh S, Han S, Lee S, et al. Cryptotanshinone inhibits IgE-mediated degranulation through inhibition of spleen tyrosine kinase and tyrosine-protein kinase phosphorylation in mast cells. Mol Med Rep. 2018;18(1):1095-1103.

17. Jeon YD, Aye A, Song YJ, Kim YH, Soh JR, Jin JS. Cyanidin 3-Rutinoside, an Anthocyanin Pigment of Schisandra chinensis Baill, Inhibits Allergic Inflammation. J Med Food. 2019;22(7):703-712.

18. Lee H, Lee DH, Oh JH, Chung JH. Skullcapflavone II Suppresses TNF-alpha/IFN-gamma-Induced TARC, MDC, and CTSS Production in HaCaT Cells. Int J Mol Sci. 2021;22(12):12.

19. Yoshioka Y, Kamata Y, Tominaga M, et al. Extract of Scutellaria baicalensis induces semaphorin 3A production in human epidermal keratinocytes. PLoS One. 2021;16(4):14.

20. Nguyen LTH, Oh T-W, Nguyen UT, Choi M-J, Yang I-J, Shin H-M. A Natural Compound Mixture Containing Arctigenin, Hederagenin, and Baicalein Alleviates Atopic Dermatitis in Mice by Regulating HPA Axis and Immune Activity. Evid Based Complement Alternat Med. 2020;2020:1970349.

21. Lin SW, Wei ML, Zhu W. Molecular mechanisms of the anti-inflammatory effect of sinomenine on atopic dermatitis. Pharmazie. 2018;73(8):474-476.

22. Nam DY, Lee JM, Heo JC, Lee SH. Mitigation of 2,4-dinitrofluorobenzene-induced atopic dermatitis-related symptoms by Terminalia chebula Retzius. Int J Mol Med. 2011;28(6):1013-1018.

23. Kang SY, Jung HW, Nam JH, et al. Effects of the Fruit Extract of Tribulus terrestris on Skin Inflammation in Mice with Oxazolone-Induced Atopic Dermatitis through Regulation of Calcium Channels, Orai-1 and TRPV3, and Mast Cell Activation. Evid-based Complement Altern Med. 2017;2017:12.

24. Reich A, Estebaranz JLL, Bahadoran P, Guillot P, Carballido F, Saint Aroman M. A spray containing extracts of oat plantlets and Uncaria tomentosa relieves pain associated with chronic inflammatory skin diseases and dermatological procedures. J Eur Acad Dermatol Venereol. 2020;34:3-11.

25. Karuppagounder V, Arumugam S, Thandavarayan RA, et al. Resveratrol attenuates HMGB1 signaling and inflammation in house dust mite-induced atopic dermatitis in mice. Int Immunopharmacol. 2014;23(2):617-623.

26. Fu S, Sun C, Tao X, Ren Y. Anti-inﬂammatory effects of active constituents extracted from Chinese medicinal herbs against Propionibacterium acnes. Nat Prod Res. 2012;26(18):1746-1749.

27. Ruksiriwanich W, Khantham C, Linsaenkart P, et al. In Vitro and In Vivo Regulation of SRD5A mRNA Expression of Supercritical Carbon Dioxide Extract from Asparagus racemosus Willd. Root as Anti-Sebum and Pore-Minimizing Active Ingredients. Molecules. 2022;27(5):16.

28. Jain A, Basal E. Inhibition of Propionibacterium acnes-induced mediators of inflammation by Indian herbs. Phytomedicine. 2003;10(1):34-38.

29. Jin S, Lee MY. The ameliorative effect of hemp seed hexane extracts on the Propionibacterium acnes-induced inflammation and lipogenesis in sebocytes. PLoS One. 2018;13(8):19.

30. Shen XQ, Guo MM, Yu HY, Liu D, Lu Z, Lu YH. Propionibacterium acnes related anti-inflammation and skin hydration activities of madecassoside, a pentacyclic triterpene saponin from Centella asiatica. Biosci Biotechnol Biochem. 2019;83(3):561-568.

31. Damkerngsuntorn W, Rerknimitr P, Panchaprateep R, et al. The Effects of a Standardized Extract of Centella asiatica on Postlaser Resurfacing Wound Healing on the Face: A Split-Face, Double-Blind, Randomized, Placebo-Controlled Trial. J Altern Complement Med. 2020;26(6):529-536.

32. Hamdy AA, Kassem HA, Awad GEA, et al. In-vitro evaluation of certain Egyptian traditional medicinal plants against Propionibacterium acnes. S Afr J Bot. 2017;109:90-95.

33. uz Zaman S, Akhtar N. Effect of Turmeric (Curcuma longa Zingiberaceae) Extract Cream on Human Skin Sebum Secretion. Trop J Pharm Res. 2013;12(5):665-669.

34. Khan BA, Akhtar N. Clinical and sebumetric evaluation of topical emulsions in the treatment of acne vulgaris. Postep Dermatol Alergol. 2014;31(4):229-234.

35. Rösch D, Bergmann M, Knorr D, Kroh LW. Structure-antioxidant efficiency relationships of phenolic compounds and their contribution to the antioxidant activity of sea buckthorn juice. J Agric Food Chem. 2003;51(15):4233-4239.

36. Tsai TH, Tsai TH, Wu WH, Tseng JTP, Tsai PJ. In vitro antimicrobial and anti-inflammatory effects of herbs against Propionibacterium acnes. Food Chem. 2010;119(3):964-968.

37. Chassagne F, Huang XY, Lyles JT, Quave CL. Validation of a 16th Century Traditional Chinese Medicine Use of Ginkgo biloba as a Topical Antimicrobial. Front Microbiol. 2019;10:13.

38. Yang G, Lee HE, Yeon SH, et al. Licochalcone A attenuates acne symptoms mediated by suppression of NLRP3 inflammasome. Phytother Res. 2018;32(12):2551-2559.

39. Barroso RA, Navarro R, Tim CR, et al. Antimicrobial photodynamic therapy againstPropionibacterium acnesbiofilms using hypericin (Hypericum perforatum) photosensitizer: in vitro study. Lasers Med Sci. 2021;36(6):1235-1240.

40. Huang WC, Tsai TH, Huang CJ, et al. Inhibitory effects of wild bitter melon leaf extract on Propionibacterium acnes-induced skin inflammation in mice and cytokine production in vitro. Food Funct. 2015;6(8):2550-2560.

41. Soleymani S, Zargaran A, Farzaei MH, et al. The effect of a hydrogel made byNigella sativaL. on acne vulgaris: A randomized double-blind clinical trial. Phytother Res. 2020;34(11):3052-3062.

42. Chaiyana W, Punyoyai C, Sriyab S, et al. Anti-Inflammatory and Antimicrobial Activities of Fermented Ocimum sanctum Linn. Extracts against Skin and Scalp Microorganisms. Chem Biodivers. 2022;19(2):12.

43. Hou JH, Shin H, Jang KH, et al. Anti-acne properties of hydrophobic fraction of red ginseng (Panax ginseng CA Meyer) and its active components. Phytother Res. 2019;33(3):584-590.

44. Qa'dan F, Thewaini AJ, Ali DA, Afifi R, Elkhawad A, Matalka KZ. The antimicrobial activities of Psidium guajava and Juglans regia leaf extracts to acne-developing organisms. Am J Chin Med. 2005;33(2):197-204.

45. Coenye T, Brackman G, Rigole P, et al. Eradication of Propionibacterium acnes biofilms by plant extracts and putative identification of icariin, resveratrol and salidroside as active compounds. Phytomedicine. 2012;19(5):409-412.

46. Chen TT, Zhu ZM, Du QQ, et al. A Skin Lipidomics Study Reveals the Therapeutic Effects of Tanshinones in a Rat Model of Acne. Front Pharmacol. 2021;12:13.

47. Guo MM, An FL, Yu HY, Wei X, Hong MH, Lu YH. Comparative effects of schisandrin A, B, and C on Propionibacterium acnes-induced, NLRP3 inflammasome activation-mediated IL-1 beta secretion and pyroptosis. Biomed Pharmacother. 2017;96:129-136.

48. Guo MM, An FL, Wei X, Hong MH, Lu YH. Comparative Effects of Schisandrin A, B, and C on Acne-Related Inflammation. Inflammation. 2017;40(6):2163-2172.

49. Zhu XJ, Mao Y, Guo MM, et al. Enhancement of anti-acne effect of Scutellaria baicalensis extract by fermentation with symbiotic fungus Penicillium decumbens. J Biosci Bioeng. 2020;130(5):457-463.

50. Tsai TH, Huang WC, Lien TJ, et al. Clove extract and eugenol suppress inflammatory responses elicited by Propionibacterium acnes in vitro and in vivo. Food Agric Immunol. 2017;28(5):916-931.

51. Patil V, Bandivadekar A, Debjani D. Inhibition of Propionibacterium acnes lipase by extracts of Indian medicinal plants. Int J Cosmet Sci. 2012;34(3):234-239.

52. Yang JH, Hwang EJ, Moon J, et al. Clinical efficacy of herbal extracts in treatment of mild to moderate acne vulgaris: an 8-week, double-blinded, randomized, controlled trial. J Dermatol Treat. 2021;32(3):297-301.

53. Fabbrocini G, Staibano S, De Rosa G, et al. Resveratrol-containing gel for the treatment of acne vulgaris: a single-blind, vehicle-controlled, pilot study. Am J Clin Dermatol. 2011;12(2):133-141.

54. Lin YY, Lu SH, Gao R, et al. A Novel Biocompatible Herbal Extract-Loaded Hydrogel for Acne Treatment and Repair. Oxid Med Cell Longev. 2021;2021:13.

55. Gaffal E, Cron M, Glodde N, Tuting T. Anti-inflammatory activity of topical THC in DNFB-mediated mouse allergic contact dermatitis independent of CB1 and CB2 receptors. Allergy. 2013;68(8):994-1000.

56. Kim TW, Choi JM, Kim MS, Son HY, Lim JH. Topical application of Scutellaria baicalensis suppresses 2,4-dinitrochlorobenzene-induced contact dermatitis. Nat Prod Res. 2016;30(6):705-709.

57. Bae MJ, Shin HS, Choi DW, Shon DH. Antiallergic effect of Trigonella foenum-graecum L. extracts on allergic skin inflammation induced by trimellitic anhydride in BALB/c mice. J Ethnopharmacol. 2012;144(3):514-522.

58. Aggarwal BB, Shishodia S. Suppression of the nuclear factor-kappaB activation pathway by spice-derived phytochemicals: reasoning for seasoning. Ann N Y Acad Sci. 2004;1030:434-441.

59. Muruganantham N, Basavaraj KH, Dhanabal SP, Praveen TK, Shamasundar NM, Rao KS. Screening of Caesalpinia bonduc leaves for antipsoriatic activity. J Ethnopharmacol. 2011;133(2):897-901.

60. More NB, Sharma N, Pulivendala G, Bale S, Godugu C. Natural product topical therapy in mitigating imiquimod-induced psoriasis-like skin inflammation-underscoring the anti-psoriatic potential of Nimbolide. Indian J Pharmacol. 2021;53(4):278-285.

61. Wilkinson JD, Williamson EM. Cannabinoids inhibit human keratinocyte proliferation through a non-CB1/CB2 mechanism and have a potential therapeutic value in the treatment of psoriasis. J Dermatol Sci. 2007;45(2):87-92.

62. OuYang Q, Pan YQ, Luo HQ, Xuan CX, Liu JE, Liu J. MAD ointment ameliorates Imiquimod-induced psoriasiform dermatitis by inhibiting the IL-23/IL-17 axis in mice. Int Immunopharmacol. 2016;39:369-376.

63. Kukula O, Kirmizikan S, Tiryaki ES, Cicekli MN, Gunaydin C. Asiatic acid exerts an anti-psoriatic effect in the imiquimod-induced psoriasis model in mice. Immunopharmacol Immunotoxicol.6.

64. Marton LT, Barbalho SM, Sloan KP, et al. Curcumin, autoimmune and inflammatory diseases: going beyond conventional therapy - a systematic review. Crit Rev Food Sci Nutr. 2022;62(8):2140-2157.

65. Balkrishna A, Sakat SS, Joshi K, et al. Cytokines Driven Anti-Inflammatory and Anti-Psoriasis Like Efficacies of Nutraceutical Sea Buckthorn (Hippophae rhamnoides) Oil. Front Pharmacol. 2019;10:15.

66. Qiong H, Han L, Zhang N, et al. Glycyrrhizin improves the pathogenesis of psoriasis partially through IL-17A and the SIRT1-STAT3 axis. BMC Immunol. 2021;22(1):34.

67. Li P, Li Y, Jiang H, et al. Glabridin, an isoflavan from licorice root, ameliorates imiquimod-induced psoriasis-like inflammation of BALB/c mice. Int Immunopharmacol. 2018;59:243-251.

68. Zhang S, Zhang J, Yu JJ, et al. Hyperforin Ameliorates Imiquimod-Induced Psoriasis-Like Murine Skin Inflammation by Modulating IL-17A-Producing gamma delta T Cells. Front Immunol. 2021;12:15.

69. Umeyama L, Hardianti B, Kasahara S, et al. Anti-inflammatory effects of Morus alba Linne bark on the activation of toll-like receptors and imiquimod-induced ear edema in mice. BMC Complement Med Ther. 2021;21(1):10.

70. Dwarampudi LP, Palaniswamy D, Nithyanantham M, Raghu PS. Antipsoriatic activity and cytotoxicity of ethanolic extract of Nigella saliva seeds. Pharmacogn Mag. 2012;8(32):268-272.

71. Li YQ, Dai XL, Li JL, et al. Notoginseng root enhances healing in imiquimod-induced psoriasis mice model via anti-inflammatory and anti-proliferative properties. Trop J Pharm Res. 2018;17(12):2365-2370.

72. Lin ZX, Jiao BW, Che CT, et al. Ethyl Acetate Fraction of the Root of Rubia cordifolia L. Inhibits Keratinocyte Proliferation In Vitro and Promotes Keratinocyte Differentiation In Vivo: Potential Application for Psoriasis Treatment. Phytother Res. 2010;24(7):1056-1064.

73. Tang LP, He SM, Wang XQ, et al. Cryptotanshinone reduces psoriatic epidermal hyperplasia via inhibiting the activation of STAT3. Exp Dermatol. 2018;27(3):268-275.

74. Li FL, Xu R, Zeng QC, et al. Tanshinone IIA Inhibits Growth of Keratinocytes through Cell Cycle Arrest and Apoptosis: Underlying Treatment Mechanism of Psoriasis. Evid-based Complement Altern Med. 2012;2012:14.

75. Kim N, Lee S, Kang J, Kwon TK, Khang D, Kim SH. Gomisin M2 alleviates psoriasis-like skin inflammation by inhibiting inflammatory signaling pathways. Mol Med Rep. 2021;24(6):10.

76. Hung CH, Wang CN, Cheng HH, et al. Baicalin Ameliorates Imiquimod-Induced Psoriasis-Like Inflammation in Mice. Planta Med. 2018;84(15):1110-1117.

77. Wu XW, Deng XE, Wang JD, Li Q. Baicalin Inhibits Cell Proliferation and Inflammatory Cytokines Induced by Tumor Necrosis Factor alpha (TNF-alpha) in Human Immortalized Keratinocytes (HaCaT) Human Keratinocytes by Inhibiting the STAT3/Nuclear Factor kappa B (NF-kappa B) Signaling Pathway. Med Sci Monitor. 2020;26:9.

78. Balkrishna A, Nain P, Chauhan A, et al. Super Critical Fluid Extracted Fatty Acids from Withania somnifera Seeds Repair Psoriasis-Like Skin Lesions and Attenuate Pro-Inflammatory Cytokines (TNF-alpha and IL-6) Release. Biomolecules. 2020;10(2):20.

79. Lee SW, Lim JH, Kim MS, et al. Phenolic compounds isolated from Zingiber officinale roots inhibit cell adhesion. Food Chem. 2011;128(3):778-782.

80. Marianecci C, Rinaldi F, Di Marzio L, et al. Ammonium glycyrrhizinate-loaded niosomes as a potential nanotherapeutic system for anti-inflammatory activity in murine models. Int J Nanomedicine. 2014;9:635-651.

81. Arndt S, Haag SF, Kleemann A, Lademann J, Meinke MC. Radical protection in the visible and infrared by a hyperforin-rich cream - in vivo versus ex vivo methods. Exp Dermatol. 2013;22(5):354-357.

82. Kohandel Z, Farkhondeh T, Aschner M, Samarghandian S. Anti-inflammatory effects of thymoquinone and its protective effects against several diseases. Biomed Pharmacother. 2021;138:111492.

83. Choi YM, An S, Lee J, et al. Titrated extract of Centella asiatica increases hair inductive property through inhibition of STAT signaling pathway in three-dimensional spheroid cultured human dermal papilla cells. Biosci Biotechnol Biochem. 2017;81(12):2323-2329.

84. Murata K, Takeshita F, Samukawa K, Tani T, Matsuda H. Effects of Ginseng Rhizome and Ginsenoside Ro on Testosterone 5 alpha-Reductase and Hair Re-growth in Testosterone-treated Mice. Phytother Res. 2012;26(1):48-53.

85. Kim AR, Kim SN, Jung IK, Kim HH, Park YH, Park WS. The Inhibitory Effect of Scutellaria baicalensis Extract and Its Active Compound, Baicalin, on the Translocation of the Androgen Receptor with Implications for Preventing Androgenetic Alopecia. Planta Med. 2014;80(2-3):153-158.

86. Dhariwala MY, Ravikumar P. An overview of herbal alternatives in androgenetic alopecia. J Cosmet Dermatol. 2019;18(4):966-975.

87. Borek C. Antioxidant health effects of aged garlic extract. J Nutr. 2001;131(3s):1010S-1015S.

88. Imai J, Ide N, Nagae S, Moriguchi T, Matsuura H, Itakura Y. Antioxidant and radical scavenging effects of aged garlic extract and its constituents. Planta Med. 1994;60(5):417-420.

89. Pangastuti A, Indriwati SE, Amin M. Investigation of the anti-aging properties of allicin from Allium sativum L bulb extracts by a reverse docking approach. Trop J Pharm Res. 2018;17(4):635-639.

90. You J, Roh KB, Li ZD, et al. The Antiaging Properties of Andrographis paniculata by Activation Epidermal Cell Sternness. Molecules. 2015;20(9):17557-17569.

91. Ngo HTT, Hwang E, Seo SA, et al. Topical application of neem leaves prevents wrinkles formation in UVB-exposed hairless mice. J Photochem Photobiol B-Biol. 2017;169:161-170.

92. Martinelli G, Magnavacca A, Fumagalli M, Dell'Agli M, Piazza S, Sangiovanni E. Cannabis sativa and Skin Health: Dissecting the Role of Phytocannabinoids. Planta Med.15.

93. Plengmuankhae W, Tantitadapitak C. Low temperature and water dehydration increase the levels of asiaticoside and madecassoside in Centella asiatica (L.) Urban. S Afr J Bot. 2015;97:196-203.

94. Meng J, Liu JJ, Chen DM, et al. Integration of lncRNA and mRNA profiles to reveal the protective effects of Codonopsis pilosula extract on the gastrointestinal tract of mice subjected to D-galactose-induced aging. Int J Mol Med. 2021;47(3):13.

95. Muta K, Inomata S, Fukuhara T, et al. Inhibitory effect of the extract of rhizome of &ITCurcuma longa&IT L in gelatinase activity and its effect on human skin. J Biosci Bioeng. 2018;125(3):353-358.

96. Kim H, Cho H, Seo YK, et al. Inhibitory effects of sea buckthorn (Hippophae rhamnoides L.) seed on UVB-induced Photoaging in human dermal fibroblasts. Biotechnol Bioprocess Eng. 2012;17(3):465-474.

97. Park JK, Kim CK, Gong SK, Yu AR, Lee MY, Park SK. Acanthopanax sessiliflorus stem confers increased resistance to environmental stresses and lifespan extension in Caenorhabditis elegans. Nutr Res Pract. 2014;8(5):526-532.

98. Pientaweeratch S, Panapisal V, Tansirikongkol A. Antioxidant, anti-collagenase and anti-elastase activities of Phyllanthus emblica, Manilkara zapota and silymarin: an in vitro comparative study for anti-aging applications. Pharm Biol. 2016;54(9):1865-1872.

99. Wang XS, Wang ZH, Yang QL, Peng S, Peng MJ. Determining the in vitro Anti-Aging Effect of the Characteristic Components from Eucommia ulmoides. J Renew Mater.15.

100. Wang XY, Gong XY, Zhang HN, et al. In vitro anti-aging activities of ginkgo biloba leaf extract and its chemical constituents. Food Sci Technol. 2020;40(2):476-482.

101. Wu Y, Wang H, Zhu J, Shen H, Liu H. Licochalcone A activation of glycolysis pathway has an anti-aging effect on human adipose stem cells. Aging (Albany NY). 2021;13(23):25180-25194.

102. Sim YY, Nyam KL. Application of Hibiscus cannabinus L. (kenaf) leaves extract as skin whitening and anti-aging agents in natural cosmetic prototype. Ind Crop Prod. 2021;167:11.

103. Mohammadirad A, Aghamohammadali-Sarraf F, Badiei S, et al. Anti-Aging Effects of Some Selected Iranian Folk Medicinal Herbs-Biochemical Evidences. Iran J Basic Med Sci. 2013;16(11):1170-1180.

104. Li YJ, Wang SY, Xin YZ, et al. Maca Cosmetics: A Review on Constituents, Therapeutics and Advantages. J Oleo Sci. 2018;67(7):789-800.

105. Chua LS, Lee SY, Abdullah N, Sarmidi MR. Review on Labisia pumila (Kacip Fatimah): Bioactive phytochemicals and skin collagen synthesis promoting herb. Fitoterapia. 2012;83(8):1322-1335.

106. Liu J, Yu Y, Zhao YP, et al. Interrelation of cholesterol-lowering, antioxidant activity and DNA damage protection to the different solvent extracts of mulberry (Morus alba L.). J Food Process Preserv. 2021;45(1):12.

107. Tungmunnithum D, Drouet S, Hano C. Validation of a High-Performance Liquid Chromatography with Photodiode Array Detection Method for the Separation and Quantification of Antioxidant and Skin Anti-Aging Flavonoids from Nelumbo nucifera Gaertn. Stamen Extract. Molecules. 2022;27(3):14.

108. Li HF, DaSilva NA, Liu WX, et al. Thymocid (R), a Standardized Black Cumin (Nigella sativa) Seed Extract, Modulates Collagen Cross-Linking, Collagenase and Elastase Activities, and Melanogenesis in Murine B16F10 Melanoma Cells. Nutrients. 2020;12(7):16.

109. Chaiyana W, Anuchapreeda S, Punyoyai C, et al. Ocimum sanctum Linn. as a natural source of skin anti-ageing compounds. Ind Crop Prod. 2019;127:217-224.

110. Yan JJ, Hao MM, Han Y, et al. Sesquiterpenes From Oplopanax elatus Stems and Their Anti-Photoaging Effects by Down-Regulating Matrix Metalloproteinase-1 Expression via Anti-Inflammation. Front Chem. 2021;9:15.

111. Oh SJ, Lee S, Choi WY, Lim CJ. Skin anti-photoaging properties of ginsenoside Rh2 epimers in UV-B-irradiated human keratinocyte cells. J Biosci. 2014;39(4):673-682.

112. Lee S, Reddy CK, Ryu JJ, et al. Solid-State Fermentation With Aspergillus cristatus Enhances the Protopanaxadiol- and Protopanaxatriol-Associated Skin Anti-aging Activity of Panax notoginseng. Front Microbiol. 2021;12:11.

113. Zhang MY, Hwang E, Lin P, Gao W, Ngo HTT, Yi TH. Prunella vulgaris L. Exerts a Protective Effect Against Extrinsic Aging through NF-kappa B, MAPKs, AP-1, and TGF-beta/Smad Signaling Pathways in UVB-Aged Normal Human Dermal Fibroblasts. Rejuv Res. 2018;21(4):313-322.

114. Wang YS, Zhou SS, Shen CY, Jiang JG. Isolation and identification of four antioxidants from Rhodiola crenulata and evaluation of their UV photoprotection capacity in vitro. J Funct Food. 2020;66:11.

115. Mao GX, Xing WM, Wen XL, et al. Salidroside protects against premature senescence induced by ultraviolet B irradiation in human dermal fibroblasts. Int J Cosmet Sci. 2015;37(3):321-328.

116. Meng H, Zhao MM, Yang RY, et al. Salvianolic acid B regulates collagen synthesis: Indirect influence on human dermal fibroblasts through the microvascular endothelial cell pathway. J Cosmet Dermatol.9.

117. Hou W, Gao W, Wang DT, Liu QX, Zheng SW, Wang YP. The Protecting Effect of Deoxyschisandrin and Schisandrin B on HaCaT Cells against UVB-Induced Damage. PLoS One. 2015;10(5):11.

118. Yoon JJ, Jeong J-W, Choi EO, et al. Protective effects of Scutellaria baicalensis Georgi against hydrogen peroxide-induced DNA damage and apoptosis in HaCaT human skin keratinocytes. EXCLI J. 2017;16:426-438.

119. Hwang E, Lin P, Ngo HTT, Yi TH. Clove attenuates UVB-induced photodamage and repairs skin barrier function in hairless mice. Food Funct. 2018;9(9):4936-4947.

120. Manosroi A, Jantrawut P, Akihisa T, Manosroi W, Manosroi J. In vitro anti-aging activities of Terminalia chebula gall extract. Pharm Biol. 2010;48(4):469-481.

121. Sanap A, Chandravanshi B, Shah T, et al. Herbal pre-conditioning induces proliferation and delays senescence in Wharton's Jelly Mesenchymal Stem Cells. Biomed Pharmacother. 2017;93:772-778.

122. Eaknai W, Bunwatcharaphansakun P, Phungbun C, et al. Ethanolic Fenugreek Extract: Its Molecular Mechanisms against Skin Aging and the Enhanced Functions by Nanoencapsulation. Pharmaceuticals. 2022;15(2):18.

123. Mammone T, Akesson C, Gan D, Giampapa V, Pero RW. A water soluble extract from Uncaria tomentosa (Cat's Claw) is a potent enhancer of DNA repair in primary organ cultures of human skin. Phytother Res. 2006;20(3):178-183.

124. Waqas MK, Akhtar N, Rasul A, Sethi A, Abbas K, Hussain T. NON-INVASIVE IN VIVO EVALUATIONS OF COSMETIC EMULSION CONTAINING PHYTOEXTRACT OF GRAPE SEEDS IN THE TREATMENT OF SKIN AGING BY USING NON-INVASIVE BIO-ENGINEERING TECHNIQUES. Acta Pol Pharm. 2018;75(1):97-105.

125. Sanap A, Chandravanshi B, Shah T, et al. Herbal pre-conditioning induces proliferation and delays senescence in Wharton's Jelly Mesenchymal Stem Cells. Biomed Pharmacother. 2017;93:772-778.

126. Yousuf S, Ahmad A, Khan A, Manzoor N, Khan LA. Effect of garlic-derived allyl sulphides on morphogenesis and hydrolytic enzyme secretion in Candida albicans. Med Mycol. 2011;49(4):444-448.

127. Mamadalieva NZ, Youssef FS, Ashour ML, Sasmakov SA, Tiezzi A, Azimova SS. Chemical composition, antimicrobial and antioxidant activities of the essential oils of three Uzbek Lamiaceae species. Nat Prod Res. 2019;33(16):2394-2397.

128. Swamy NT, Rosaiah G, Babu K, Kumar KV. A STUDY ON PHYTOCHEMICAL COMPOSITION, GC-MS ANALYSIS AND ANTI-MICROBIAL POTENTIAL OF METHANOLIC LEAF EXTRACT OF ALSTONIA SCHOLARIS (L.) R. BR. International Journal of Pharmaceutical Sciences and Research. 2019;10(2):747-755.

129. Balakumar S, Rajan S, Thirunalasundari T, Jeeva S. Antifungal activity of Aegle marmelos (L.) Correa (Rutaceae) leaf extract on dermatophytes. Asian Pacific journal of tropical biomedicine. 2011;1(4):309-312.

130. Chuah XQ, Mun W, Sen Teo S. Comparison study of anti-microbial activity between crude extract of Kappaphycus alvarezii and Andrographis paniculata. Asian Pacific Journal of Tropical Biomedicine. 2017;7(8):729-731.

131. da Silva RM, da Silva IDM, Estevinho MM, Estevinho LM. Anti-bacterial activity of Annona muricata Linnaeus extracts: a systematic review. Food Sci Technol. 2022;42:10.

132. Onlom C, Khanthawong S, Waranuch N, Ingkaninan K. In vitro anti-Malassezia activity and potential use in anti-dandruff formulation of Asparagus racemosus. Int J Cosmet Sci. 2014;36(1):74-78.

133. Al Akeel R, Mateen A, Janardhan K, Gupta VC. Analysis of anti-bacterial and anti oxidative activity of Azadirachta indica bark using various solvents extracts. Saudi J Biol Sci. 2017;24(1):11-14.

134. Jain P, Sharma HP, Basri F, Priya K, Singh P. Phytochemical analysis of Bacopa monnieri (L.) Wettst. and their anti-fungal activities. Indian J Tradit Knowl. 2017;16(2):310-318.

135. Manosroi A, Chankhampan C, Kietthanakorn BO, et al. Pharmaceutical and Cosmeceutical Biological Activities of Hemp (Cannabis sativa L var. sativa) Leaf and Seed Extracts. Chiang Mai J Sci. 2019;46(2):180-195.

136. Saranya TS, Rajan VK, Biswas R, Jayakumar R, Sathianarayanan S. Synthesis, characterisation and biomedical applications of curcumin conjugated chitosan microspheres. Int J Biol Macromol. 2018;110:227-233.

137. Tian Y, Puganen A, Alakomi HL, Uusitupa A, Saarela M, Yang BR. Antioxidative and antibacterial activities of aqueous ethanol extracts of berries, leaves, and branches of berry plants. Food Res Int. 2018;106:291-303.

138. Lee S, Shin D-S, Oh K-B, Shin KH. Antibacterial compounds from the leaves of Acanthopanax senticosus. Arch Pharm Res. 2003;26(1):40-42.

139. Hasan S, Danishuddin M, Adil M, Singh K, Verma PK, Khan AU. Efficacy of E. officinalis on the cariogenic properties of Streptococcus mutans: a novel and alternative approach to suppress quorum-sensing mechanism. PLoS One. 2012;7(7):e40319.

140. Zhang L, Ravipati AS, Koyyalamudi SR, et al. Anti-fungal and anti-bacterial activities of ethanol extracts of selected traditional Chinese medicinal herbs. Asian Pac J Trop Med. 2013;6(9):673-681.

141. Boateng ID. A Review of Ginkgo biloba L. Seed's Protein; Physicochemical Properties, Bioactivity, and Allergic Glycoprotein. Food Rev Int.18.

142. Gupta VK, Fatima A, Faridi U, et al. Antimicrobial potential of Glycyrrhiza glabra roots. J Ethnopharmacol. 2008;116(2):377-380.

143. Karimi E, Jaafar HZE, Ghasemzadeh A, Ebrahimi M. Fatty acid composition, antioxidant and antibacterial properties of the microwave aqueous extract of three varieties of Labisia pumila Benth. Biol Res. 2015;48:6.

144. Sun L, Zhang XP, Dong L, Zhang CY, Guo P, Wu CM. The triterpenoids of the bitter gourd (Momordica Charantia) and their pharmacological activities: A review. J Food Compos Anal. 2021;96:14.

145. Kim BS, Kim H, Kang SS. In vitro anti-bacterial and anti-inflammatory activities of lactic acid bacteria-biotransformed mulberry (Morus alba Linnaeus) fruit extract against Salmonella Typhimurium. Food Control. 2019;106:8.

146. Rath CC, Priyadarshanee M. Evaluation of In-vitro Antibacterial Activity of Selected Essential Oils. J Essent Oil Bear Plants. 2017;20(2):359-367.

147. Sittiwet C. Antimicrobial Activity of Essential Oil from Nelumbo nucifera Gaertn. Pollen. Int J Pharmacol. 2009;5(1):98-100.

148. Landa P, Marsik P, Vanek T, Rada V, Kokoska L. In vitro anti-microbial activity of extracts from the callus cultures of some Nigella species. Biologia. 2006;61(3):285-288.

149. Lee DG, Lee AY, Kim KT, Cho EJ, Lee S. Novel Dammarane-Type Triterpene Saponins from Panax ginseng Root. Chem Pharm Bull. 2015;63(11):927-934.

150. Reddy PS, Jamil K, Madhusudhan P, Anjani G, Das B. Antibacterial activity of isolates from Piper longum and Taxus baccata. Pharm Biol. 2001;39(3):236-238.

151. Abdelrahim SI, Almagboul AZ, Omer MEA, Elegami A. Antimicrobial activity of Psidium guajava L. Fitoterapia. 2002;73(7-8):713-715.

152. Zu RL, Yi H, Yi YL, Yong JY, Li Y. Effect of Cryptotanshinone on Staphylococcus epidermidis Biofilm Formation Under In Vitro Conditions. Jundishapur J Microbiol. 2019;12(4):11.

153. Luo J, Dong B, Wang K, et al. Baicalin inhibits biofilm formation, attenuates the quorum sensing-controlled virulence and enhances Pseudomonas aeruginosa clearance in a mouse peritoneal implant infection model. PLoS One. 2017;12(4):e0176883.

154. Kuttinath S, Murugan S, Rammohan R. Inhibition of Methicillin Resistant Staphylococcus aureus Biofilm by Ethanol Extracts of Sauropus androgynus and Solanum torvum. Indian J Pharm Sci. 2021;83(6):1155-1163.

155. Vasconcelos PGS, Maia CMD, de Vasconcelos VM, et al. In vitro inhibition of a multispecies oral cavity biofilm by Syzygium aromaticum essential oil. Gerodontology.8.

156. Lee J, Nho YH, Yun SK, Hwang YS. Use of ethanol extracts of Terminalia chebula to prevent periodontal disease induced by dental plaque bacteria. BMC Complement Altern Med. 2017;17:10.

157. Shanthi P, Venkatalakshmi P. Antimicrobial Activity and Preliminary Phytochemical Analysis of Tinospora cordifolia. J Pure Appl Microbiol. 2011;5(1):477-479.

158. Ganesh PS, Rai VR. Evaluation of Anti-bacterial and Anti-quorum Sensing Potential of Essential Oils Extracted by Supercritical CO2 Method Against Pseudomonas aeruginosa. J Essent Oil Bear Plants. 2015;18(2):264-275.

159. Bayazid A, Jang YA. The Role of Andrographolide on Skin Inflammations and Modulation of Skin Barrier Functions in Human Keratinocyte. Biotechnol Bioprocess Eng. 2021;26(5):804-813.

160. Li W, Yang HJ. Isolation and Identification of Lignans and Other Phenolic Constituents from the Stem Bark of Albizia julibrissin Durazz and Evaluation of Their Nitric Oxide Inhibitory Activity. Molecules. 2020;25(9):9.

161. Shang JH, Cai XH, Feng T, et al. Pharmacological evaluation of Alstonia scholaris: Anti-inflammatory and analgesic effects. J Ethnopharmacol. 2010;129(2):174-181.

162. Kumari K, Weerakoon TCS, Handunnetti SM, Samarasinghe K, Suresh TS. Anti-inflammatory activity of dried flower extracts of Aegle marmelos in Wistar rats. J Ethnopharmacol. 2014;151(3):1202-1208.

163. Lee DY, Li H, Lim HJ, Lee HJ, Jeon R, Ryu JH. Anti-Inflammatory Activity of Sulfur-Containing Compounds from Garlic. J Med Food. 2012;15(11):992-999.

164. Cercato LM, Araujo JMD, Oliveira AS, et al. Reduced cutaneous inflammation associated with antioxidant action after topical application of the aqueous extract ofAnnona muricataleaves. Inflammopharmacology. 2021;29(1):307-315.

165. Nhiem NX, Lim HY, Kiem PV, et al. Oleanane-type triterpene saponins from the bark of Aralia elata and their NF-kappa B inhibition and PPAR activation signal pathway. Bioorg Med Chem Lett. 2011;21(20):6143-6147.

166. Gokhale AB, Damre AS, Kulkarni KR, Saraf MN. Preliminary evaluation of anti-inflammatory and anti-arthritic activity of S-lappa, A-speciosa and A-aspera. Phytomedicine. 2002;9(5):433-437.

167. Plangsombat N, Rungsardthong K, Kongkaneramit L, Waranuch N, Sarisuta N. Anti-inflammatory activity of liposomes of Asparagus racemosus root extracts prepared by various methods. Exp Ther Med. 2016;12(4):2790-2796.

168. Ilango K, Maharajan G, Narasimhan S. Anti-nociceptive and anti-inflammatory activities of Azadirachta indica fruit skin extract and its isolated constituent azadiradione. Nat Prod Res. 2013;27(16):1463-1467.

169. Bairwa K, Singh IN, Roy SK, Grover J, Srivastava A, Jachak SM. Rotenoids from Boerhaavia diffusa as Potential Anti-inflammatory Agents. J Nat Prod. 2013;76(8):1393-1398.

170. Ilhan M, Dereli FTA, Tulmen I, Akkol EK. Anti-inflammatory and antinociceptive features of Bryonia alba L.: As a possible alternative in treating rheumatism. Open Chem. 2019;17(1):23-30.

171. Krolikiewicz-Renimel I, Michel T, Destandau E, et al. Protective effect of a Butea monosperma (Lam.) Taub. flowers extract against skin inflammation: Antioxidant, anti-inflammatory and matrix metalloproteinases inhibitory activities. J Ethnopharmacol. 2013;148(2):537-543.

172. Liu T, Li X, Ning ZX, Qi SZ, Gao HY. Two new cassane-type diterpenoids from the seed kernels of Caesalpinia bonduc (Linn.) Roxb. and their anti-inflammatory activity. Nat Prod Res.8.

173. Sunda F, Arowolo A. A molecular basis for the anti-inflammatory and anti-fibrosis properties of cannabidiol. Faseb J. 2020;34(11):14083-14092.

174. Bourgou S, Rebey IB, Dakhlaoui S, et al. Green extraction of oil from Carum carvi seeds using bio-based solvent and supercritical fluid: Evaluation of its antioxidant and anti-inflammatory activities. Phytochem Anal. 2020;31(1):37-45.

175. George M, Joseph L, Ramaswamy. ANTI-ALLERGIC, ANTI-PRURITIC, AND ANTI-INFLAMMATORY ACTIVITIES OF CENTELLA ASIATICA EXTRACTS. Afr J Tradit Complement Alt M. 2009;6(4):554-559.

176. Sibul F, Orcic D, Vasic M, et al. Phenolic profile, antioxidant and anti-inflammatory potential of herb and root extracts of seven selected legumes. Ind Crop Prod. 2016;83:641-653.

177. Ishola IO, Akindele AJ, Adeyemi OO. Analgesic and anti-inflammatory activities of Cnestis ferruginea Vahl ex DC (Connaraceae) methanolic root extract. J Ethnopharmacol. 2011;135(1):55-62.

178. Meng Y, Xu YJ, Chang C, et al. Extraction, characterization and anti-inflammatory activities of an inulin-type fructan from Codonopsis pilosula. Int J Biol Macromol. 2020;163:1677-1686.

179. Venkatesh P, Mukherjee PK, Kumar S, et al. Mast cell stabilization and antihistaminic potentials of Curculigo orchioides rhizomes. J Ethnopharmacol. 2009;126(3):434-436.

180. Hwang BM, Noh EM, Kim JS, et al. Curcumin inhibits UVB-induced matrix metalloproteinase-1/3 expression by suppressing the MAPK-p38/JNK pathways in human dermal fibroblasts. Exp Dermatol. 2013;22(5):371-374.

181. Ahmed S, Moni DA, Sonawane KD, Paek KY, Shohael AM. A comprehensivein silicoexploration of pharmacological properties, bioactivities and COX-2 inhibitory potential of eleutheroside B fromEleutherococcus senticosus(Rupr. & Maxim.) Maxim. J Biomol Struct Dyn. 2021;39(17):6553-6566.

182. Han D, Liu Y, Li XM, et al. Elesesterpenes A-K: Lupane-type Triterpenoids From the Leaves of Eleutherococcus sessiliflorus. Front Chem. 2022;9:10.

183. Lee DY, Seo KH, Jeong RH, et al. Anti-inflammatory Lignans from the Fruits of Acanthopanax sessiliflorus. Molecules. 2013;18(1):41-49.

184. Middha SK, Goyal AK, Lokesh P, et al. Toxicological Evaluation of Emblica officinalis Fruit Extract and its Anti-inflammatory and Free Radical Scavenging Properties. Pharmacogn Mag. 2015;11(44):S427-S433.

185. Kim BH, Park KS, Chang IM. Elucidation of Anti-inflammatory Potencies of Eucommia ulmoides Bark and Plantago asiatica Seeds. J Med Food. 2009;12(4):764-769.

186. Jing R, Li HQ, Hu CL, Jiang YP, Qin LP, Zheng CJ. Phytochemical and Pharmacological Profiles of Three Fagopyrum Buckwheats. Int J Mol Sci. 2016;17(4):20.

187. Zhou XL, Yang M, Xue BG, et al. Anti-inflammatory action of Ginkgo Biloba leaf polysaccharide via TLR4/NF-kappa b signaling suppression. Biomed Res-India. 2014;25(4):449-454.

188. Siracusa L, Saija A, Cristani M, et al. Phytocomplexes from liquorice (Glycyrrhiza glabra L.) leaves - Chemical characterization and evaluation of their antioxidant, anti-genotoxic and anti-inflammatory activity. Fitoterapia. 2011;82(4):546-556.

189. Eberlin S, Pereda MDV, Dieamant GD, Nogueira C, Werka RM, Queiroz MLD. Effects of a Brazilian herbal compound as a cosmetic eyecare for periorbital hyperchromia ("dark circles"). J Cosmet Dermatol. 2009;8(2):127-135.

190. Rho HS, Ghimeray AK, Yoo DS, et al. Kaempferol and Kaempferol Rhamnosides with Depigmenting and Anti-Inflammatory Properties. Molecules. 2011;16(4):3338-3344.

191. Sharma S, Lakshmi KS, Patidar A, Chaudhary A, Dhaker S. Studies on anti-inflammatory effect of aqueous extract of leaves of Holoptelea integrifolia, Planch. in rats. Indian J Pharmacol. 2009;41(2):87-88.

192. Huang N, Rizshsky L, Hauck C, Nikolau BJ, Murphy PA, Birt DF. Identification of anti-inflammatory constituents in Hypericum perforatum and Hypericum gentianoides extracts using RAW 264.7 mouse macrophages. Phytochemistry. 2011;72(16):2015-2023.

193. Sharma D, Rawat I, Goel HC. Anticancer and anti-inflammatory activities of some dietary cucurbits. Indian J Exp Biol. 2015;53(4):216-221.

194. Lee YK, Jung SK, Chang YH. Rheological properties of a neutral polysaccharide extracted from maca (Lepidium meyenii Walp.) roots with prebiotic and anti-inflammatory activities. Int J Biol Macromol. 2020;152:757-765.

195. Rahmi EP, Jamal JA, Kumolosasi E, Jalil J, Aladdin NA. Marantodes pumilum (Blume) Kuntze Inhibited Secretion of Lipopolysaccharide- and Monosodium Urate Crystal-stimulated Cytokines and Plasma Prostaglandin E-2. Pharmacogn Mag. 2017;13(51):S578-S586.

196. Liu YT, Gong PH, Xiao FQ, et al. Chemical Constituents and Antioxidant, Anti-Inflammatory and Anti-Tumor Activities of Melilotus officinalis (Linn.) Pall. Molecules. 2018;23(2):12.

197. Hsu C, Tsai TH, Li YY, Wu WH, Huang CJ, Tsai PJ. Wild bitter melon (Momordica charantia Linn. var. abbreviata Ser.) extract and its bioactive components suppress Propionibacterium acnes-induced inflammation. Food Chem. 2012;135(3):976-984.

198. Chaiyana W, Charoensup W, Sriyab S, Punyoyai C, Neimkhum W. Herbal Extracts as Potential Antioxidant, Anti-Aging, Anti-Inflammatory, and Whitening Cosmeceutical Ingredients. Chem Biodivers. 2021;18(7):14.

199. Avoseh ON, Ogunwande IA, Ojenike GO, Mtunzi FM. Volatile Composition, Toxicity, Analgesic, and Anti-Inflammatory Activities of Mucuna pruriens. Nat Prod Commun. 2020;15(7):9.

200. Sindhu RK, Arora S. ANTI-INFLAMMATORY POTENTIAL OF DIFFERENT EXTRACTS ISOLATED FROM THE ROOTS OF FICUS LACOR BUCH. HUM AND MURRAYA KOENIGII L. SPRENG. Arch Biol Sci. 2014;66(3):1261-1270.

201. Al-Ghamdi MS. The anti-inflammatory, analgesic and antipyretic activity of Nigella sativa. J Ethnopharmacol. 2001;76(1):45-48.

202. Kwon KS, Lim H, Kwon YS, et al. Inhibitory Mechanisms of Water Extract of Oplopanax elatus on Lipopolysaccharide-Induced Inflammatory Responses in RAW 264.7 Murine Macrophage Cells. Chin J Integr Med. 2020;26(9):670-676.

203. Paul S, Shin HS, Kang SC. Inhibition of inflammations and macrophage activation by ginsenoside-Re isolated from Korean ginseng (Panax ginseng C.A. Meyer). Food Chem Toxicol. 2012;50(5):1354-1361.

204. Huang SS, Deng JS, Lin JG, Lee CY, Huang GJ. Anti-Inflammatory Effects of Trilinolein from Panax notoginseng Through the Suppression of NF-kappa B and MAPK Expression and Proinflammatory Cytokine Expression. Am J Chin Med. 2014;42(6):1485-1506.

205. Londonkar R, Kamble A, Reddy VC. Anti-Inflammatory Activity of Pandanus odoratissimus Extract. Int J Pharmacol. 2010;6(3):311-314.

206. Machado KN, Barbosa AD, de Freitas AA, et al. TNF-alpha inhibition, antioxidant effects and chemical analysis of extracts and fraction from Brazilian guarana seed powder. Food Chem. 2021;355:8.

207. Reanmongkol W, Noppapan T, Subhadhirasakul S. Antinociceptive, antipyretic, and anti-inflammatory activities of Putranjiva roxburghii Wall. leaf extract in experimental animals. J Nat Med. 2009;63(3):290-296.

208. Bhitre MJ, Fulmali S, Kataria M, Anwikar S, Kadri H. Antiinflammatory activity of the fruits of Piper longum Linn. Asian J Chem. 2008;20(6):4357-4360.

209. Huang N, Hauck C, Yum MY, et al. Rosmarinic Acid in Prunella vulgaris Ethanol Extract Inhibits Lipopolysaccharide-Induced Prostaglandin E2 and Nitric Oxide in RAW 264.7 Mouse Macrophages. J Agric Food Chem. 2009;57(22):10579-10589.

210. de Araujo AA, Soares LAL, Ferreira MRA, et al. Quantification of polyphenols and evaluation of antimicrobial, analgesic and anti-inflammatory activities of aqueous and acetone-water extracts of Libidibia ferrea, Parapiptadenia rigida and Psidium guajava. J Ethnopharmacol. 2014;156:88-96.

211. Anilkumar K, Reddy GV, Azad R, et al. Evaluation of Anti-Inflammatory Properties of Isoorientin Isolated from Tubers of Pueraria tuberosa. Oxid Med Cell Longev. 2017;2017:10.

212. Skala E, Rijo P, Garcia C, et al. The Essential Oils of Rhaponticum carthamoides Hairy Roots and Roots of Soil-Grown Plants: Chemical Composition and Antimicrobial, Anti-Inflammatory, and Antioxidant Activities. Oxid Med Cell Longev. 2016;2016:10.

213. Lee JW, Kim YS, Dong X, et al. Anti-inflammatory effect of Rhodiola crenulata extracts through the down-regulation of MyD88 dependent pathway and induction of autophagy. J Funct Food. 2020;64:9.

214. Pu WL, Zhang MY, Bai RY, et al. Anti-inflammatory effects of Rhodiola rosea L.: A review. Biomed Pharmacother. 2020;121:10.

215. Ghosh S, Sarma MD, Patra A, Hazra B. Anti-inflammatory and anticancer compounds isolated from Ventilago madraspatana Gaertn., Rubia cordifolia Linn. and Lantana camara Linn. J Pharm Pharmacol. 2010;62(9):1158-1166.

216. Jang SI, Kim HJ, Kim YJ, Jeong SI, You YO. Tanshinone IIA inhibits LPS-induced NF-kappa B activation in RAW 264.7 cells: Possible involvement of the NIK-IKK, ERK1/2, p38 and JNK pathways. Eur J Pharmacol. 2006;542(1-3):1-7.

217. Huyke C, Engel K, Simon-Haarhaus B, Quirin KW, Schempp CM. Composition and biological activity of different extracts from Schisandra sphenanthera and Schisandra chinensis. Planta Med. 2007;73(10):1116-1126.

218. Lee H, Lee DH, Oh J-H, Chung JH. Skullcapflavone II Suppresses TNF-α/IFN-γ-Induced TARC, MDC, and CTSS Production in HaCaT Cells. Int J Mol Sci. 2021;22(12).

219. Franzotti EM, Santos CVF, Rodrigues H, Mourao RHV, Andrade MR, Antoniolli AR. Anti-inflammatory, analgesic activity and acute toxicity of Sida cordifolia L. (Malva-branca). J Ethnopharmacol. 2000;72(1-2):273-278.

220. Li RW, Lin GD, Myers SP, Leach DN. Anti-inflammatory activity of Chinese medicinal vine plants. J Ethnopharmacol. 2003;85(1):61-67.

221. Ndebia EJ, Kamgang R, Nkeh-ChungagAnye BN. Analgesic and anti-inflammatory properties of aqueous extract from leaves of Solanum torvum (Solanaceae). Afr J Tradit Complement Alt M. 2007;4(2):240-244.

222. Camille N, Dealtry G. Regulation of M1/M2 macrophage polarization by Sutherlandia frutescens via NFkB and MAPK signaling pathways. S Afr J Bot. 2018;116:42-51.

223. Daniel AN, Sartoretto SM, Schmidt G, Caparroz-Assef SM, Bersani-Amado CA, Cuman RKN. Anti-inflammatory and antinociceptive activities of eugenol essential oil in experimental animal models. Rev Bras Farmacogn-Braz J Pharmacogn. 2009;19(1B):212-217.

224. Yang MH, Ali Z, Khan IA, Khan SI. Anti-inflammatory Activity of Constituents Isolated from Terminalia chebula. Nat Prod Commun. 2014;9(7):965-968.

225. Tian CL, Chang Y, Liu X, et al. Anti-inflammatory activity in vitro, extractive process and HPLC-MS characterization of total saponins extract from Tribulus terrestris L. fruits. Ind Crop Prod. 2020;150:9.

226. Vicentini FA, Barbosa MMC, Fortunato MC, et al. Treatment with Trichilia catigua ethyl-acetate fraction improves healing and reduces oxidative stress in TNBS-induced colitis in rats. Biomed Pharmacother. 2018;107:194-202.

227. Gupta V, Guleri R, Gupta M, et al. Anti-neuroinflammatory potential of Tylophora indica (Burm. f) Merrill and development of an efficient in vitro propagation system for its clinical use. PLoS One. 2020;15(3):20.

228. Allen-Hall L, Arnason JT, Cano P, Lafrenie RM. Uncaria tomentosa acts as a potent TNF-alpha inhibitor through NF-kappa B. J Ethnopharmacol. 2010;127(3):685-693.

229. Benbouguerra N, Valls-Fonayet J, Krisa S, et al. Polyphenolic Characterization of Merlot, Tannat and Syrah Skin Extracts at Different Degrees of Maturity and Anti-Inflammatory Potential in RAW 264.7 Cells. Foods. 2021;10(3):14.

230. Balkrishna A, Solleti SK, Singh H, Sharma N, Varshney A. Withanolides from Withania somnifera Ameliorate Neutrophil Infiltration in Endotoxin-Induced Peritonitis by Regulating Oxidative Stress and Inflammatory Cytokines. Planta Med.13.

231. Zammel N, Saeed M, Bouali N, et al. Antioxidant and Anti-Inflammatory Effects of Zingiber officinale roscoe and Allium subhirsutum: In Silico, Biochemical and Histological Study. Foods. 2021;10(6):19.

232. Meer S, Akhtar N. Annona muricata extract containing pharmaceutical emulgels with and without penetration enhancer for depigmenting and antierythmic effects. Pak J Pharm Sci. 2018;31(6):2683-2688.

233. Jeon HJ, Kim K, Kim C, Kim MJ, Kim TO, Lee SE. Molecular Mechanisms of Anti-Melanogenic Gedunin Derived from Neem Tree (Azadirachta indica) Using B16F10 Mouse Melanoma Cells and Early-Stage Zebrafish. Plants-Basel. 2021;10(2):11.

234. Pop C, Vlase L, Tamas M. Natural Resources Containing Arbutin. Determination of Arbutin in the Leaves of Bergenia crassifolia (L.) Fritsch acclimated in Romania. Not Bot Horti Agrobot Cluj-Na. 2009;37(1):129-132.

235. Kim JK, Heo HY, Park S, et al. Characterization of Phenethyl Cinnamamide Compounds from Hemp Seed and Determination of Their Melanogenesis Inhibitory Activity. ACS Omega. 2021;6(47):31945-31954.

236. Kwon KJ, Bae S, Kim K, et al. Asiaticoside, a component of Centella asiatica, inhibits melanogenesis in B16F10 mouse melanoma. Mol Med Rep. 2014;10(1):503-507.

237. Lv JP, Yang Y, Jia BY, Li SQ, Zhang XM, Gao RY. The Inhibitory Effect of Curcumin Derivative J147 on Melanogenesis and Melanosome Transport by Facilitating ERK-Mediated MITF Degradation. Front Pharmacol. 2021;12:12.

238. Zhang JC, Wang CT, Wang CT, Sun BG, Qi C. Understanding the role of extracts from sea buckthorn seed residues in anti- melanogenesis properties on B16F10 melanoma cells. Food Funct. 2018;9(10):5402-5416.

239. Zhao ZF, Ma SL, Dong XL. Anti-melanogenesis Efficacy of Ginkgolide B is Favored by Attenuating Oxidative Stress and Melanin Synthesis in B16f1 Melanoma Cell Model. Int J Pharmacol. 2019;15(5):560-566.

240. Kang MH, Jang GY, Ji YJ, et al. Antioxidant and Anti-Melanogenic Activities of Heat-Treated Licorice (Wongam, Glycyrrhiza glabra x G. uralensis) Extract. Curr Issues Mol Biol. 2021;43(2):1171-1187.

241. Ersoy E, Ozkan EE, Boga M, Yilmaz MA, Mat A. Anti-aging potential and anti-tyrosinase activity of three Hypericum species with focus on phytochemical composition by LC-MS/MS. Ind Crop Prod. 2019;141:9.

242. Wang Y, Zhao CM, Guo T, Zhu YL, Zhao P. Preliminary screening of 44 plant extracts for anti-tyrosinase and antioxidant activities. Pak J Pharm Sci. 2015;28(5):1737-1744.

243. Lee SH, Choi SY, Kim H, et al. Mulberroside F isolated from the leaves of Morus alba inhibits melanin biosynthesis. Biol Pharm Bull. 2002;25(8):1045-1048.

244. Kim T, Kim HJ, Cho SK, et al. Nelumbo nucifera extracts as whitening and anti-wrinkle cosmetic agent. Korean J Chem Eng. 2011;28(2):424-427.

245. Kim K. Effect of ginseng and ginsenosides on melanogenesis and their mechanism of action. J Ginseng Res. 2015;39(1):1-6.

246. Dai CY, Liu PF, Liao PR, et al. Optimization of Flavonoids Extraction Process in Panax notoginseng Stem Leaf and a Study of Antioxidant Activity and Its Effects on Mouse Melanoma B16 Cells. Molecules. 2018;23(9):16.

247. Lee DU, Weon KY, Nam DY, Nam JH, Kim WK. Skin protective effect of guava leaves against UV-induced melanogenesis via inhibition of ORAI1 channel and tyrosinase activity. Exp Dermatol. 2016;25(12):977-982.

248. Chiang HM, Chien YC, Wu CH, et al. Hydroalcoholic extract of Rhodiola rosea L. (Crassulaceae) and its hydrolysate inhibit melanogenesis in B16F0 cells by regulating the CREB/MITF/tyrosinase pathway. Food Chem Toxicol. 2014;65:129-139.

249. Chae JK, Subedi L, Jeong M, et al. Gomisin N Inhibits Melanogenesis through Regulating the PI3K/Akt and MAPK/ERK Signaling Pathways in Melanocytes. Int J Mol Sci. 2017;18(2):13.

250. Kudo M, Kobayashi-Nakamura K, Tsuji-Naito K. Bifunctional effects of O-methylated flavones from Scutellaria baicalensis Georgi on melanocytes: Inhibition of melanin production and intracellular melanosome transport. PLoS One. 2017;12(2):26.

251. Arung ET, Kusuma IW, Christy EO, Shimizu K, Kondo R. Evaluation of medicinal plants from Central Kalimantan for antimelanogenesis. J Nat Med. 2009;63(4):473-480.

252. Arung ET, Matsubara E, Kusuma IW, Sukaton E, Shimizu K, Kondo R. Inhibitory components from the buds of clove (Syzygium aromaticum) on melanin formation in B16 melanoma cells. Fitoterapia. 2011;82(2):198-202.

253. Manosroi A, Jantrawut P, Akazawa H, Akihisa T, Manosroi J. Biological activities of phenolic compounds isolated from galls of Terminalia chebula Retz. (Combretaceae). Nat Prod Res. 2010;24(20):1915-1926.

254. Lin YS, Chen HJ, Huang JP, et al. Kinetics of Tyrosinase Inhibitory Activity Using Vitis vinifera Leaf Extracts. Biomed Res Int. 2017;2017:5.

255. Oh TI, Jung HJ, Lee YM, et al. Zerumbone, a Tropical Ginger Sesquiterpene of Zingiber officinale Roscoe, Attenuates -MSH-Induced Melanogenesis in B16F10 Cells. Int J Mol Sci. 2018;19(10):17.

256. Bassino E, Gasparri F, Munaron L. Protective Role of Nutritional Plants Containing Flavonoids in Hair Follicle Disruption: A Review. Int J Mol Sci. 2020;21(2):17.

257. Shin JY, Shin DJ, Kang HJ, Cho BO, Park JH, Jang SI. Hair loss improvement effect of Chrysanthemum zawadskii, peppermint and Glycyrrhiza glabra herbal mixture in human follicle dermal papilla cell and C57BL/6 mice. Food Sci Technol. 2022;42:7.

258. Hyun J, Im J, Kim SW, Kim HY, Seo I, Bhang SH. Morus alba Root Extract Induces the Anagen Phase in the Human Hair Follicle Dermal Papilla Cells. Pharmaceutics. 2021;13(8):16.

259. Park S, Shin WS, Ho J. Fructus panax ginseng extract promotes hair regeneration in C57BL/6 mice. J Ethnopharmacol. 2011;138(2):340-344.

260. Noudeh GD, Sharififar F, Khazaeli P, Mohajeri E, Jahanbakhsh J. Formulation of herbal conditioner shampoo by using extract of fenugreek seeds and evaluation of its physicochemical parameters. Afr J Pharm Pharmacol. 2011;5(22):2420-2427.
